# Supplementary material
Source: ML conference proceedings conference paper supplement (https://proceedings.neurips.cc/paper_files/paper/2023/hash/cb7943be26bb34f036c7e4068c490903-Abstract.html)
Supplement: Supplementary file 1 [file cb7943be26bb34f036c7e4068c490903-Supplemental-Conference.pdf]

# A graphon-signal analysis of graph neural networks

## Supplementary material

**Note to reviewers on modified constants:** when finalizing the writing of the proofs in the supplementary material, we realized that we can improve the constant in the regularity lemma from  $9/4$  to  $2$ . Hence, there is a difference in this constant between the appendix and the main paper. We also corrected the constant in the sampling lemmas. We will make the minor modification of changing the constants in the main paper in the revised paper.

### A

#### B Basic definitions and properties of graphon-signals

In this appendix, we give basic properties of graphon-signals, cut norm, and cut distance.

##### B.1 Lebesgue spaces and signal spaces

For  $1 \leq p < \infty$ , the space  $\mathcal{L}^p[0, 1]$  is the space of (equivalence classes up to null-set) of measurable functions  $f : [0, 1] \rightarrow \mathbb{R}$ , with finite  $L_1$  norm

$$\|f\|_p = \left( \int_0^1 |f(x)|^p dx \right)^{1/p} < \infty.$$

The space  $\mathcal{L}^\infty[0, 1]$  is the space of (equivalence classes) of measurable functions with finite  $L_\infty$  norm

$$\|f\|_\infty = \text{ess sup}_{x \in [0, 1]} |f(x)| = \inf \{a \geq 0 \mid |f(x)| \leq a \text{ for almost every } x \in [0, 1]\}.$$

##### B.2 Properties of cut norm

Every  $f \in \mathcal{L}_r^\infty[0, 1]$  can be written as  $f = f_+ - f_-$ , where

$$f_+(x) = \begin{cases} f(x) & f(x) > 0 \\ 0 & f(x) \leq 0. \end{cases}$$

and  $f_-$  is defined similarly. It is easy to see that the supremum in (3) is attained for  $S$  which is either the support of  $f_+$  or  $f_-$ , and

$$\|f\|_\square = \max\{\|f_+\|_1, \|f_-\|_1\}.$$

As a result, the signal cut norm is equivalent to the  $L_1$  norm

$$\frac{1}{2}\|f\|_1 \leq \|f\|_\square \leq \|f\|_1. \tag{11}$$

Moreover, for every  $r > 0$  and measurable function  $W : [0, 1]^2 \rightarrow [-r, r]$ ,

$$0 \leq \|W\|_\square \leq \|W\|_1 \leq \|W\|_2 \leq \|W\|_\infty \leq r.$$

The following lemma is from [23, Lemma 8.10].

**Lemma B.1.** *For every measurable  $W : [0, 1] \rightarrow \mathbb{R}$ , the supremum*

$$\sup_{S, T \subset [0, 1]} \left| \int_S \int_T W(x, y) dx dy \right|$$

*is attained for some  $S, T$ .*

### B.3 Properties of cut distance and measure preserving bijections

Recall that we denote the standard Lebesgue measure of  $[0, 1]$  by  $\mu$ . Let  $S_{[0,1]}$  be the space of measurable bijections  $[0, 1] \rightarrow [0, 1]$  with measurable inverse, that are measure preserving, namely, for every measurable  $A \subset [0, 1]$ ,  $\mu(A) = \mu(\phi(A))$ . Recall that  $S'_{[0,1]}$  is the space of measurable bijections between co-null sets of  $[0, 1]$ .

For  $\phi \in S_{[0,1]}$  or  $\phi \in S'_{[0,1]}$ , we define  $W^\phi(x, y) := W(\phi(x), \phi(y))$ . In case  $\phi \in S'_{[0,1]}$ ,  $W^\phi$  is only defined up to a null-set, and we arbitrarily set  $W$  to 0 in this null-set. This does not affect our analysis, as the cut norm is not affected by changes to the values of functions on a null sets. The *cut-metric* between graphons is then defined to be

$$\begin{aligned} \delta_\square(W, W^\phi) &= \inf_{\phi \in S'_{[0,1]}} \|W - W^\phi\|_\square \\ &= \inf_{\phi \in S'_{[0,1]}} \sup_{S, T \subseteq [0,1]} \left| \int_{S \times T} (W(x, y) - W(\phi(x), \phi(y))) dx dy \right|. \end{aligned}$$

**Remark B.2.** Note that  $\delta_\square$  can be defined equivalently with respect to  $\phi \in S'_{[0,1]}$ . Indeed, By [23, Equation (8.17) and Theorem 8.13],  $\delta_\square$  can be defined equivalently with respect to the measure preserving maps that are not necessarily invertible. These include the extensions of mappings from  $S'_{[0,1]}$  by defining  $\phi(x) = 0$  for every  $x$  in the co-null set underlying  $\phi$ .

Similarly to the graphon case, the graphon-signal distance  $\delta_\square$  is a pseudo-metric. By introducing an equivalence relation  $(W, f) \sim (V, g)$  if  $\delta_\square((W, f), (V, g)) = 0$ , and the quotient space  $\widetilde{\mathcal{WL}}_r := \mathcal{WL}_r / \sim$ ,  $\widetilde{\mathcal{WL}}_r$  is a metric space with a metric  $\delta_\square$  defined by  $\delta_\square([(W, f)], [(V, g)]) = d_\square(W, V)$  where  $[(W, f)], [(V, g)]$ , are the equivalence classes of  $(W, f)$  and  $(V, g)$  respectively. By abuse of terminology, we call elements of  $\widetilde{\mathcal{WL}}_r$  also graphon-signals.

**Remark B.3.** We note that  $\widetilde{\mathcal{WL}}_r \neq \widetilde{\mathcal{W}}_0 \times \widetilde{\mathcal{L}}_r^\infty[0, 1]$  (for the natural definition of  $\widetilde{\mathcal{L}}_r^\infty[0, 1]$ ), since in  $\widetilde{\mathcal{WL}}_r$  we require that the measure preserving bijection is shared between the graphon  $W$  and the signal  $f$ . Sharing the measure preserving bijection between  $W$  and  $f$  is an important modelling requirement, as  $\phi$  is seen as a “re-indexing” of the node set  $[0, 1]$ . When re-indexing a node  $x$ , both the neighborhood  $W(x, \cdot)$  of  $x$  and the signal value  $f(x)$  at  $x$  should change together, otherwise, the graphon and the signal would fall out of alignment.

We identify graphs with their induced graphons and signal with their induced signals

## C Graphon-signal regularity lemmas

In this appendix, we prove a number of versions of the graphon-signal regularity lemma, where Theorem 3.4 is one version.

### C.1 Properties of partitions and step functions

Given a partition  $\mathcal{P}_k$  and  $d \in \mathbb{N}$ , the next lemma shows that there is an equipartition  $\mathcal{E}_n$  such that the space  $\mathcal{S}_{\mathcal{E}_n}^d$  uniformly approximates the space  $\mathcal{S}_{\mathcal{P}_k}^d$  in  $\mathcal{L}^1[0, 1]^d$  norm (see Definition 3.3).

**Lemma C.1** (Equitizing partitions). *Let  $\mathcal{P}_k$  be a partition of  $[0, 1]$  into  $k$  sets (generally not of the same measure). Then, for any  $n > k$  there exists an equipartition  $\mathcal{E}_n$  of  $[0, 1]$  into  $n$  sets such that any function  $F \in \mathcal{S}_{\mathcal{P}_k}^d$  can be approximated in  $\mathcal{L}^1[0, 1]^d$  by a function from  $F \in \mathcal{S}_{\mathcal{E}_n}^d$  up to small error. Namely, for every  $F \in \mathcal{S}_{\mathcal{P}_k}^d$  there exists  $F' \in \mathcal{S}_{\mathcal{E}_n}^d$  such that*

$$\|F - F'\|_1 \leq d \|F\|_\infty \frac{k}{n}.$$

*Proof.* Let  $\mathcal{P}_k = \{P_1, \dots, P_k\}$  be a partition of  $[0, 1]$ . For each  $i$ , we divide  $P_i$  into subsets  $\mathbf{P}_i = \{P_{i,1}, \dots, P_{i,m_i}\}$  of measure  $1/n$  (up to the last set) with a residual, as follows. If  $\mu(P_i) < 1/n$ , we choose  $\mathbf{P}_i = \{P_{i,1} = P_i\}$ . Otherwise, we take  $P_{i,1}, \dots, P_{i,m_i-1}$  of measure  $1/n$ , and  $\mu(P_{i,m_i}) \leq 1/n$ . We call  $P_{i,m_i}$  the remainder.

411 We now define the sequence of sets of measure  $1/n$

$$\mathcal{Q} := \{P_{1,1}, \dots, P_{1,m_1-1}, P_{2,1}, \dots, P_{2,m_2-1}, \dots, P_{k,1}, \dots, P_{k,m_k-1}\}, \quad (12)$$

412 where, by abuse of notation, for any  $i$  such that  $m_i = 1$ , we set  $\{P_{i,1}, \dots, P_{i,m_i-1}\} = \emptyset$  in the  
 413 above formula. Note that in general  $\cup \mathcal{Q} \neq [0, 1]$ . We moreover define the union of residuals  
 414  $\Pi := P_{1,m_1} \cup P_{2,m_2} \cup \dots \cup P_{k,m_k}$ . Note that  $\mu(\Pi) = 1 - \mu(\cup \mathcal{Q}) = 1 - k \frac{1}{n} = h/n$ , where  $k$  is the  
 415 number of elements in  $\mathcal{Q}$ , and  $h = n - k$ . Hence, we can partition  $\Pi$  into  $h$  parts  $\{\Pi_1, \dots, \Pi_h\}$  of  
 416 measure  $1/n$  with no residual. Thus we have obtain the equipartition of  $[0, 1]$  to  $n$  sets of measure  
 417  $1/n$

$$\mathcal{E}_n := \{P_{1,1}, \dots, P_{1,m_1-1}, P_{2,1}, \dots, P_{2,m_2-1}, \dots, S_{k,1}, \dots, S_{k,m_k-1}, \Pi_1, \Pi_2, \dots, \Pi_h\}. \quad (13)$$

418 For convenience, we also denote  $\mathcal{E}_n = \{Z_1, \dots, Z_n\}$ .

419 Let

$$F(x) = \sum_{j=(j_1, \dots, j_d) \in [k]^d} c_j \prod_{l=1}^d \mathbb{1}_{P_{j_l}}(x_l) \in \mathcal{S}_{\mathcal{P}_k}^d.$$

420 We can write  $F$  with respect to the equipartition  $\mathcal{E}_n$  as

$$F(x) = \sum_{j=(j_1, \dots, j_d) \in [n]^d; \forall l=1, \dots, d, Z_{j_l} \not\subset \Pi} \tilde{c}_j \prod_{l=1}^d \mathbb{1}_{Z_{j_l}}(x_l) + E(x),$$

421 for some  $\{\tilde{c}_j\}$  with the same values as the values of  $\{c_j\}$ . Here,  $E$  is supported in the set  $\Pi^{(d)} \subset$   
 422  $[0, 1]^d$ , defied by

$$\Pi^{(d)} = (\Pi \times [0, 1]^{d-1}) \cup ([0, 1] \times \Pi \times [0, 1]^{d-2}) \cup \dots \cup ([0, 1]^{d-1} \times \Pi).$$

423 Consider the step function

$$F'(x) = \sum_{j=(j_1, \dots, j_d) \in [n]^d; \forall l=1, \dots, d, Z_{j_l} \not\subset \Pi} \tilde{c}_j \prod_{l=1}^d \mathbb{1}_{Z_{j_l}}(x_l) \in \mathcal{S}_{\mathcal{E}_n}^d.$$

424 Since  $\mu(\Pi) = k/n$ , we have  $\mu(\Pi^{(d)}) = dk/n$ , and so

$$\|F - F'\|_1 \leq d \|F\|_\infty \frac{k}{n}.$$

425

**Lemma C.2.** Let  $\{Q_1, Q_2, \dots, Q_m\}$  partition of  $[0, 1]$ . Let  $\{I_1, I_2, \dots, I_m\}$  be a partition of  $[0, 1]$  into intervals, such that for every  $j \in [m]$ ,  $\mu(Q_j) = \mu(I_j)$ . Then, there exists a measure preserving bijection  $\phi : [0, 1] \rightarrow [0, 1] \in \mathcal{S}'_{[0,1]}$  such that<sup>4</sup>

$$\phi(Q_j) = I_j$$

426 *Proof.* By the definition of a standard probability space, the measure space induced by  $[0, 1]$  on a  
 427 non-null subset  $Q_j \subseteq [0, 1]$  is a standard probability space. Moreover, each  $Q_j$  is atomless, since  
 428  $[0, 1]$  is atomless. Since there is a measure-preserving bijection (up to null-set) between any two  
 429 atomless standard probability spaces, we obtain the result. ■

430 **Lemma C.3.** Let  $\mathcal{S} = \{S_j \subset [0, 1]\}_{j=0}^{m-1}$  be a collection of measurable sets (that are not disjoint in  
 431 general), and  $d \in \mathbb{N}$ . Let  $\mathcal{C}_\mathcal{S}^d$  be the space of functions  $F : [0, 1]^d \rightarrow \mathbb{R}$  of the form

$$F(x) = \sum_{j=(j_1, \dots, j_d) \in [m]^d} c_j \prod_{l=1}^d \mathbb{1}_{S_{j_l}}(x_l),$$

432 for some choice of  $\{c_j \in \mathbb{R}\}_{j \in [m]^d}$ . Then, there exists a partition  $\mathcal{P}_k = \{P_1, \dots, P_k\}$  into  $k = 2^m$   
 433 sets, that depends only on  $\mathcal{S}$ , such that

$$\mathcal{C}_\mathcal{S}^d \subset \mathcal{S}_{\mathcal{P}_k}^d.$$

<sup>4</sup>Namely, there is a measure preserving bijection  $\phi$  between two co-null sets  $C_1$  and  $C_2$  of  $[0, 1]$ , such that  $\phi(Q_j \cap C_1) = I_j \cap C_2$ .

434 *Proof.* The partition  $\mathcal{P}_k = \{P_1, \dots, P_k\}$  is defined as follows. Let

$$\tilde{\mathcal{P}} = \{P \subset [0, 1] \mid \exists x \in [0, 1], P = \cap \{S_j \in \mathcal{S} \mid x \in S_j\}\}.$$

435 We must have  $|\tilde{\mathcal{P}}| \leq 2^m$ . Indeed, there are at most  $2^m$  different subsets of  $\mathcal{S}$  for the intersections.  
 436 We endow an arbitrary order to  $\tilde{\mathcal{P}}$  and turn it into a sequence. If the size of  $\tilde{\mathcal{P}}$  is strictly smaller than  
 437  $2^m$ , we add enough copies of  $\{\emptyset\}$  to  $\tilde{\mathcal{P}}$  to make the size of the sequence  $2^m$ , that we denote by  $\mathcal{P}_k$ ,  
 438 where  $k = 2^m$ . ■

439 The following simple lemma is proved similarly to [Lemma C.3](#). We give it without proof.

440 **Lemma C.4.** *Let  $\mathcal{P}_k = \{P_1, \dots, P_k\}$ ,  $\mathcal{Q}_m = \{Q_1, \dots, Q_m\}$  be two partitions. Then, there exists a*  
 441 *partition  $\mathcal{Z}_{km}$  into  $km$  sets such that for every  $d$ ,*

$$\mathcal{S}_{\mathcal{P}_k}^d \subset \mathcal{S}_{\mathcal{Z}_{km}}^d, \quad \text{and} \quad \mathcal{S}_{\mathcal{Q}_m}^d \subset \mathcal{S}_{\mathcal{Z}_{km}}^d.$$

## 442 C.2 List of graphon-signal regularity lemmas

443 The following lemma from [\[24, Lemma 4.1\]](#) is a tool in the proof of the weak regularity lemma.

444 **Lemma C.5.** *Let  $\mathcal{K}_1, \mathcal{K}_2, \dots$  be arbitrary nonempty subsets (not necessarily subspaces) of a Hilbert*  
 445 *space  $\mathcal{H}$ . Then, for every  $\epsilon > 0$  and  $v \in \mathcal{H}$  there is  $m \leq \lceil 1/\epsilon^2 \rceil$  and  $v_i \in \mathcal{K}_i$  and  $\gamma_i \in \mathbb{R}$ ,  $i \in [m]$ ,*  
 446 *such that for every  $w \in \mathcal{K}_{m+1}$*

$$\left| \left\langle w, v - \left( \sum_{i=1}^m \gamma_i v_i \right) \right\rangle \right| \leq \epsilon \|w\| \|v\|. \quad (14)$$

447 The following theorem is an extension of the graphon regularity lemma from [\[24\]](#) to the case of  
 448 graphon-signals. Much of the proof follows the steps of [\[24\]](#).

449 **Theorem C.6** (Weak regularity lemma for graphon-signals). *Let  $\epsilon, \rho > 0$ . For every  $(W, f) \in \mathcal{WL}_r$*   
 450 *there exists a partition  $\mathcal{P}_k$  of  $[0, 1]$  into  $k = \lceil r/\rho \rceil \left( 2^{2\lceil 1/\epsilon^2 \rceil} \right)$  sets, a step function graphon  $W_k \in$*   
 451  *$\mathcal{S}_{\mathcal{P}_k}^2 \cap \mathcal{W}_0$  and a step function signal  $f_k \in \mathcal{S}_{\mathcal{P}_k}^1 \cap \mathcal{L}_r^\infty[0, 1]$ , such that*

$$\|W - W_k\|_\square \leq \epsilon \quad \text{and} \quad \|f - f_k\|_\square \leq \rho. \quad (15)$$

452 *Proof.* We first analyze the graphon part. In [Lemma C.5](#), set  $\mathcal{H} = \mathcal{L}^2([0, 1]^2)$  and for all  $i \in \mathbb{N}$ , set

$$\mathcal{K}_i = \mathcal{K} = \{\mathbb{1}_{S \times T} \mid S, T \subset [0, 1] \text{ measurable}\}.$$

453 Then, by [Lemma C.5](#), there exists  $m \leq \lceil 1/\epsilon^2 \rceil$  two sequences of sets  $\mathcal{S}_m = \{S_i\}_{i=1}^m$ ,  $\mathcal{T}_m = \{T_i\}_{i=1}^m$ ,  
 454 a sequence of coefficients  $\{\gamma_i \in \mathbb{R}\}_{i=1}^m$ , and

$$W_\epsilon = \sum_{i=1}^m \gamma_i \mathbb{1}_{S_i \times T_i},$$

455 such that for any  $V \in \mathcal{K}$ , given by  $V(x, y) = \mathbb{1}_S(x) \mathbb{1}_T(y)$ , we have

$$\left| \int V(x, y) (W(x, y) - W_\epsilon(x, y)) dx dy \right| = \left| \int_S \int_T (W(x, y) - W_\epsilon(x, y)) dx dy \right| \quad (16)$$

$$\leq \epsilon \|\mathbb{1}_{S \times T}\| \|W\| \leq \epsilon. \quad (17)$$

456 We may choose exactly  $m = \lceil 1/\epsilon^2 \rceil$  by adding copies of the empty set to  $\mathcal{S}_m$  and  $\mathcal{T}_m$ , if the constant  
 457  $m$  guaranteed by [Lemma C.5](#) is strictly less than  $\lceil 1/\epsilon^2 \rceil$ . Consider the concatenation of the two  
 458 sequences  $\mathcal{T}_m, \mathcal{S}_m$  given by  $\mathcal{Y}_{2m} = \mathcal{T}_m \cup \mathcal{S}_m$ . Note that in the notation of [Lemma C.3](#),  $W_\epsilon \in \mathcal{C}_{\mathcal{Y}_{2m}}^2$ .

459 Hence, by [Lemma C.3](#), there exists a partition  $\mathcal{Q}_n$  into  $n = 2^{2m} = 2^{2\lceil \frac{1}{\epsilon^2} \rceil}$  sets, such that  $W_\epsilon$  is a step  
 460 graphon with respect to  $\mathcal{Q}_n$ .

461 To analyze the signal part, we partition the range of the signal  $[-r, r]$  into  $j = \lceil r/\rho \rceil$  intervals  
 462  $\{J_i\}_{i=1}^j$  of length less or equal to  $2\rho$ , where the left edge point of each  $J_i$  is  $-r + (i-1)\frac{\rho}{r}$ . Consider

the partition of  $[0, 1]$  based on the preimages  $\mathcal{Y}_j = \{Y_i = f^{-1}(J_i)\}_{i=1}^j$ . It is easy to see that for the step signal

$$f_\rho(x) = \sum_{i=1}^j a_i \mathbb{1}_{Y_i}(x),$$

where  $a_i$  the midpoint of the interval  $Y_i$ , we have

$$\|f - f_\rho\|_\square \leq \|f - f_\rho\|_1 \leq \rho.$$

Lastly, by [Lemma C.4](#), there is a partition  $\mathcal{P}_k$  of  $[0, 1]$  into  $k = \lceil r/\rho \rceil \left(2^{2\lceil 1/\epsilon^2 \rceil}\right)$  sets such that  $W_\epsilon \in \mathcal{S}_{\mathcal{P}_k}^2$  and  $f_\rho \in \mathcal{S}_{\mathcal{P}_k}^1$ .

**Corollary C.7** (Weak regularity lemma for graphon-signals – version 2). *Let  $r > 0$  and  $c > 1$ . For every sufficiently small  $\epsilon > 0$  (namely,  $\epsilon$  that satisfies (19)), and for every  $(W, f) \in \mathcal{WL}_r$  there exists a partition  $\mathcal{P}_k$  of  $[0, 1]$  into  $k = \left(2^{\lceil 2c/\epsilon^2 \rceil}\right)$  sets, a step graphon  $W_k \in \mathcal{S}_{\mathcal{P}_k}^2 \cap \mathcal{W}_0$  and a step signal  $f_k \in \mathcal{S}_{\mathcal{P}_k}^1 \cap \mathcal{L}_r^\infty[0, 1]$ , such that*

$$d_\square((W, f), (W_k, f_k)) \leq \epsilon.$$

*Proof.* First, evoke [Theorem C.6](#), with errors  $\|W - W_k\|_\square \leq \nu$  and  $\|f - f_k\|_\square \leq \rho = \epsilon - \nu$ . We now show that there is some  $\epsilon_0 > 0$  such that for every  $\epsilon < \epsilon_0$ , there is a choice of  $\nu$  such that the number of sets in the partition, guaranteed by [Theorem C.6](#), satisfies

$$k(\nu) := \lceil r/(\epsilon - \nu) \rceil \left(2^{2\lceil 1/\nu^2 \rceil}\right) \leq 2^{\lceil 2c/\epsilon^2 \rceil}.$$

Denote  $c = 1 + t$ . In case

$$\nu \geq \sqrt{\frac{2}{2(1 + 0.5t)/\epsilon^2 - 1}}, \quad (18)$$

we have

$$2^{2\lceil 1/\nu^2 \rceil} \leq 2^{2(1+0.5t)/\epsilon^2}.$$

On the other hand, for

$$\nu \leq \epsilon - \frac{r}{2t/\epsilon^2 - 1},$$

we have

$$\lceil r/(\epsilon - \nu) \rceil \leq 2^{2(0.5t)/\epsilon^2}.$$

The reconcile these two conditions, we restrict to  $\epsilon$  such that

$$\epsilon - \frac{r}{2t/\epsilon^2 - 1} \geq \sqrt{\frac{2}{2(1 + 0.5t)/\epsilon^2 - 1}}. \quad (19)$$

There exists  $\epsilon_0$  that depends on  $c$  and  $r$  (and hence also on  $t$ ) such that for every  $\epsilon < \epsilon_0$  (19) is satisfied. Indeed, for small enough  $\epsilon$ ,

$$\frac{1}{2t/\epsilon^2 - 1} = \frac{2^{-t/\epsilon^2}}{1 - 2^{-t/\epsilon^2}} < 2^{-t/\epsilon^2} < \frac{\epsilon}{r} \left(1 - \frac{1}{1 + 0.1t}\right),$$

so

$$\epsilon - \frac{r}{2t/\epsilon^2 - 1} > \epsilon(1 + 0.1t).$$

Moreover, for small enough  $\epsilon$ ,

$$\sqrt{\frac{2}{2(1 + 0.5t)/\epsilon^2 - 1}} = \epsilon \sqrt{\frac{1}{(1 + 0.5t) - \epsilon^2}} < \epsilon/(1 + 0.4t).$$

Hence, for every  $\epsilon < \epsilon_0$ , there is a choice of  $\nu$  such that

$$k(\nu) = \lceil r/(\epsilon - \nu) \rceil \left(2^{2\lceil 1/\nu^2 \rceil}\right) \leq 2^{2(0.5t)/\epsilon^2} 2^{2(1+0.5t)/\epsilon^2} \leq 2^{\lceil 2c/\epsilon^2 \rceil}.$$

Lastly, we add as many copies of  $\emptyset$  to  $\mathcal{P}_{k(\nu)}$  as needed so that we get a sequence of  $k = 2^{\lceil 2c/\epsilon^2 \rceil}$  sets.

**Theorem C.8** (Regularity lemma for graphon-signals – equipartition version). *Let  $c > 1$  and  $r > 0$ . For any sufficiently small  $\epsilon > 0$ , and every  $(W, f) \in \mathcal{WL}_r$  there exists  $\phi \in S'_{[0,1]}$ , a step function graphon  $[W^\phi]_n \in \mathcal{S}_{\mathcal{I}_n}^2 \cap \mathcal{W}_0$  and a step signal  $[f^\phi]_n \in \mathcal{S}_{\mathcal{I}_n}^1 \cap \mathcal{L}_r^\infty[0, 1]$ , such that*

$$d_\square \left( (W^\phi, f^\phi), ([W^\phi]_n, [f^\phi]_n) \right) \leq \epsilon, \quad (20)$$

where  $\mathcal{I}_n$  is the equipartition of  $[0, 1]$  into  $n = 2^{\lceil 2c/\epsilon^2 \rceil}$  intervals.

*Proof.* Let  $c = 1 + t > 1$ ,  $\epsilon > 0$  and  $0 < \alpha, \beta < 1$ . In [Corollary C.7](#), consider the approximation error

$$d_\square((W, f), (W_k, f_k)) \leq \alpha\epsilon.$$

with a partition  $\mathcal{P}_k$  into  $k = 2^{\lceil \frac{2(1+t/2)}{(\epsilon\alpha)^2} \rceil}$  sets. We next equatize the partition  $\mathcal{P}_k$  up to error  $\epsilon\beta$ . More accurately, in [Lemma C.1](#), we choose

$$n = \lceil 2^{\frac{2(1+0.5t)}{(\epsilon\alpha)^2} + 1} / (\epsilon\beta) \rceil,$$

and note that

$$n \geq 2^{\lceil \frac{2(1+0.5t)}{(\epsilon\alpha)^2} \rceil} \lceil 1/\epsilon\beta \rceil = k \lceil 1/\epsilon\beta \rceil.$$

By [Lemma C.1](#) and by the fact that the cut norm is bounded by  $L_1$  norm, there exists an equipartition  $\mathcal{E}_n$  into  $n$  sets, and step functions  $W_n$  and  $f_n$  with respect to  $\mathcal{E}_n$  such that

$$\|W_k - W_n\|_\square \leq 2\epsilon\beta \quad \text{and} \quad \|f_k - f_n\|_1 \leq r\epsilon\beta.$$

Hence, by the triangle inequality,

$$d_\square((W, f), (W_n, f_n)) \leq d_\square((W, f), (W_k, f_k)) + d_\square((W_k, f_k), (W_n, f_n)) \leq \epsilon(\alpha + (2 + r)\beta).$$

In the following, we restrict to choices of  $\alpha$  and  $\beta$  which satisfy  $\alpha + (2 + r)\beta = 1$ . Consider the function  $n : (0, 1) \rightarrow \mathbb{N}$  defined by

$$n(\alpha) := \lceil 2^{\frac{4(1+0.5t)}{(\epsilon\alpha)^2} + 1} / (\epsilon\beta) \rceil = \lceil (2 + r) \cdot 2^{\frac{9(1+0.5t)}{4(\epsilon\alpha)^2} + 1} / (\epsilon(1 - \alpha)) \rceil.$$

Using a similar technique as in the proof of [Corollary C.7](#), there is  $\epsilon_0 > 0$  that depends on  $c$  and  $r$  (and hence also on  $t$ ) such that for every  $\epsilon < \epsilon_0$ , we may choose  $\alpha_0$  (that depends on  $\epsilon$ ) which satisfies

$$n(\alpha_0) = \lceil (2 + r) \cdot 2^{\frac{2(1+0.5t)}{(\epsilon\alpha_0)^2} + 1} / (\epsilon(1 - \alpha_0)) \rceil < 2^{\lceil \frac{2c}{\epsilon^2} \rceil}. \quad (21)$$

Moreover, there is a choice  $\alpha_1$  which satisfies

$$n(\alpha_1) = \lceil (2 + r) \cdot 2^{\frac{2(1+0.5t)}{(\epsilon\alpha_1)^2} + 1} / (\epsilon(1 - \alpha_1)) \rceil > 2^{\lceil \frac{2c}{\epsilon^2} \rceil}. \quad (22)$$

We note that the function  $n : (0, 1) \rightarrow \mathbb{N}$  satisfies the following intermediate value property. For every  $0 < \alpha_1 < \alpha_2 < 1$  and every  $m \in \mathbb{N}$  between  $n(\alpha_1)$  and  $n(\alpha_2)$ , there is a point  $\alpha \in [\alpha_1, \alpha_2]$

such that  $n(\alpha) = m$ . This follows the fact that  $\alpha \mapsto (2 + r) \cdot 2^{\frac{2(1+0.5t)}{(\epsilon\alpha)^2} + 1} / (\epsilon(1 - \alpha))$  is a continuous function. Hence, by (21) and (22), there is a point  $\alpha$  (and  $\beta$  such that  $\alpha + (2 + r)\beta = 1$ ) such that

$$n(\alpha) = n = \lceil 2^{\frac{2(1+0.5t)}{(\epsilon\alpha)^2} + 1} / (\epsilon\beta) \rceil = 2^{\lceil 2c/\epsilon^2 \rceil}.$$

510 ■

By a slight modification of the above proof, we can replace  $n$  with the constant  $n = \lceil 2^{\frac{2c}{\epsilon^2}} \rceil$ . As a result, we can easily prove that for any  $n' \geq 2^{\lceil \frac{2c}{\epsilon^2} \rceil}$  we have the approximation property (20) with  $n'$  instead of  $n$ . This is done by choosing an appropriate  $c' > c$  and using [Theorem C.8](#) on  $c'$ , giving a constant  $n' = \lceil 2^{\frac{2c'}{\epsilon^2}} \rceil \geq 2^{\lceil \frac{2c}{\epsilon^2} \rceil} = n$ . This leads to the following corollary.

**Corollary C.9** (Regularity lemma for graphon-signals – equipartition version 2). *Let  $c > 1$  and  $r > 0$ . For any sufficiently small  $\epsilon > 0$ , for every  $n \geq 2^{\lceil \frac{2c}{\epsilon^2} \rceil}$  and every  $(W, f) \in \mathcal{WL}_r$ , there exists  $\phi \in S'_{[0,1]}$ , a step function graphon  $[W^\phi]_n \in \mathcal{S}_{\mathcal{I}_n}^2 \cap \mathcal{W}_0$  and a step function signal  $[f^\phi]_n \in \mathcal{S}_{\mathcal{I}_n}^1 \cap \mathcal{L}_r^\infty[0, 1]$ , such that*

$$d_\square \left( (W^\phi, f^\phi), ([W^\phi]_n, [f^\phi]_n) \right) \leq \epsilon,$$

where  $\mathcal{I}_n$  is the equipartition of  $[0, 1]$  into  $n$  intervals.

Next, we prove that we can use the average of the graphon and the signal in each part for the approximating graphon-signal. For that we define the projection of a graphon signal upon a partition.

**Definition C.10.** Let  $\mathcal{P}_n = \{P_1, \dots, P_n\}$  be a partition of  $[0, 1]$ , and  $(W, f) \in \mathcal{WL}_r$ . We define the projection of  $(W, f)$  upon  $(\mathcal{S}_{\mathcal{P}}^2 \times \mathcal{S}_{\mathcal{P}}^1) \cap \mathcal{WL}_r$  to be the step graphon-signal  $(W, f)_{\mathcal{P}_n} = (W_{\mathcal{P}_n}, f_{\mathcal{P}_n})$  that attains the value

$$W_{\mathcal{P}_n}(x, y) = \int_{P_i \times P_j} W(x, y) dx dy, \quad f_{\mathcal{P}_n}(x) = \int_{P_i} f(x) dx$$

for every  $(x, y) \in P_i \times P_j$ .

At the cost of replacing the error  $\epsilon$  by  $2\epsilon$ , we can replace  $W'$  with its projection. This was shown in [1]. Since this paper does not use the exact same setting as us, for completeness, we write a proof of the claim below.

**Corollary C.11** (Regularity lemma for graphon-signals – projection version). *For any  $c > 1$ , and any sufficiently small  $\epsilon > 0$ , for every  $n \geq 2^{\lceil \frac{8\epsilon}{\epsilon^2} \rceil}$  and every  $(W, f) \in \mathcal{WL}_r$ , there exists  $\phi \in \mathcal{S}'_{[0,1]}$ , such that such that*

$$d_{\square} \left( (W^{\phi}, f^{\phi}), ([W^{\phi}]_{\mathcal{I}_n}, [f^{\phi}]_{\mathcal{I}_n}) \right) \leq \epsilon.$$

where  $\mathcal{I}_n$  is the equipartition of  $[0, 1]$  into  $n$  intervals.

We first prove a simple lemma.

**Lemma C.12.** Let  $\mathcal{P}_n = \{P_1, \dots, P_n\}$  be a partition of  $[0, 1]$ , and Let  $V, R \in \mathcal{S}_{\mathcal{P}_n}^2 \cap \mathcal{W}_0$ . Then, the supremum of

$$\sup_{S, T \subset [0,1]} \left| \int_S \int_T (V(x, y) - R(x, y)) dx dy \right| \quad (23)$$

is attained for  $S, T$  of the form

$$S = \bigcup_{i \in s} P_i, \quad T = \bigcup_{j \in t} P_j,$$

where  $t, s \subset [n]$ . Similarly for any two signals  $f, g \in \mathcal{S}_{\mathcal{P}_n}^1 \cap \mathcal{L}_r^{\infty}[0, 1]$ , the supremum of

$$\sup_{S \subset [0,1]} \left| \int_S (f(x) - g(x)) dx \right| \quad (24)$$

is attained for  $S$  of the form

$$S = \bigcup_{i \in s} P_i,$$

where  $s \subset [n]$ .

*Proof.* First, by Lemma B.1, the supremum of (23) is attained for some  $S, T \subset [0, 1]$ . Given the maximizers  $S, T$ , without loss of generality, suppose that

$$\int_S \int_T (V(x, y) - R(x, y)) dx dy > 0.$$

we can improve  $T$  as follows. Consider the set  $t \subset [n]$  such that for every  $j \in t$

$$\int_S \int_{T \cap P_j} (V(x, y) - R(x, y)) dx dy > 0.$$

By increasing the set  $T \cap P_j$  to  $P_j$ , we can only increase the size of the above integral. Indeed,

$$\begin{aligned} \int_S \int_{P_j} (V(x, y) - R(x, y)) dx dy &= \frac{\mu(P_j)}{\mu(T \cap P_j)} \int_S \int_{T \cap P_j} (V(x, y) - R(x, y)) dx dy \\ &\geq \int_S \int_{T \cap P_j} (V(x, y) - R(x, y)) dx dy. \end{aligned}$$

544 Hence, by increasing  $T$  to

$$T' = \bigcup_{\{j|T \cap P_j \neq \emptyset\}} P_j,$$

545 we get

$$\int_S \int_{T'} (V(x, y) - R(x, y)) dx dy \geq \int_S \int_T (V(x, y) - R(x, y)) dx dy.$$

546 We similarly replace each  $T \cap P_j$  such that

$$\int_S \int_{T \cap P_j} (V(x, y) - R(x, y)) dx dy \leq 0$$

547 by the empty set. We now repeat this process for  $S$ , which concludes the proof for the graphon part.

548 For the signal case, let  $f = f_+ - f_-$ , and suppose without loss of generality that  $\|f\|_\square = \|f\|_1$ . It is  
 549 easy to see that the supremum of (24) is attained for the support of  $f_+$ , which has the required form.  
 550 ■

551 *Proof.* Proof of Corollary C.11 Let  $W_n \in \mathcal{S}_{\mathcal{P}_n} \cap \mathcal{W}_0$  be the step graphon guaranteed by Corollary C.9,  
 552 with error  $\epsilon/2$  and measure preserving bijection  $\phi \in \mathcal{S}'_{[0,1]}$ . Without loss of generality, we suppose  
 553 that  $W^\phi = W$ . Otherwise, we just denote  $W' = W^\phi$  and replace the notation  $W$  with  $W'$  in the  
 554 following. By Lemma C.12, the infimum underlying  $\|W_{\mathcal{P}_n} - W_n\|_\square$  is attained for for some

$$S = \bigcup_{i \in s} P_i, \quad T = \bigcup_{j \in t} P_j.$$

555 We now have, by definition of the projected graphon,

$$\begin{aligned} \|W_n - W_{\mathcal{P}_n}\|_\square &= \left| \sum_{i \in s, j \in t} \int_{P_i} \int_{P_j} (W_{\mathcal{P}_n}(x, y) - W_n(x, y)) dx dy \right| \\ &= \left| \sum_{i \in s, j \in t} \int_{P_i} \int_{P_j} (W(x, y) - W_n(x, y)) dx dy \right| \\ &= \left| \int_S \int_T (W(x, y) - W_n(x, y)) dx dy \right| = \|W_n - W\|_\square. \end{aligned}$$

556 Hence, by the triangle inequality,

$$\|W - W_{\mathcal{P}_n}\|_\square \leq \|W - W_n\|_\square + \|W_n - W_{\mathcal{P}_n}\|_\square < 2\|W_n - W\|_\square.$$

557 A similar argument shows

$$\|f - f_{\mathcal{P}_n}\|_\square < 2\|f_n - f\|_\square.$$

558 Hence,

$$d_\square \left( (W^\phi, f^\phi), ([W^\phi]_{\mathcal{I}_n}, [f^\phi]_{\mathcal{I}_n}) \right) \leq 2d_\square \left( (W^\phi, f^\phi), ([W^\phi]_n, [f^\phi]_n) \right) \leq \epsilon.$$

559 ■

## 560 D Compactness and covering number of the graphon-signal space

561 In this appendix we prove Theorem 3.5.

562 Given a partition  $\mathcal{P}_k$ , recall that

$$[\mathcal{W}\mathcal{L}_r]_{\mathcal{P}_k} := (\mathcal{W}_0 \cap \mathcal{S}_{\mathcal{P}_k}^2) \times (\mathcal{L}_r^\infty[0, 1] \cap \mathcal{S}_{\mathcal{P}_k}^1)$$

563 is called the space of SBMs or step graphon-signals with respect to  $\mathcal{P}_k$ . Recall that  $\widetilde{\mathcal{W}\mathcal{L}_r}$  is the  
 564 space of equivalence classes of graphon-signals with zero  $\delta_\square$  distance, with the  $\delta_\square$  metric (defined on  
 565 arbitrary representatives). By abuse of terminology, we call elements of  $\widetilde{\mathcal{W}\mathcal{L}_r}$  also graphon-signals.

566 **Theorem D.1.** *The metric space  $(\widetilde{\mathcal{W}\mathcal{L}_r}, \delta_\square)$  is compact.*

The proof is a simple extension of [24, Lemma 8] from the case of graphon to the case of graphon-signal. The proof relies on the notion of martingale. A martingale is a sequence of random variables for which, for each element in the sequence, the conditional expectation of the next value in the sequence is equal to the present value, regardless of all prior values. The Martingale convergence theorem states that for any bounded martingale  $\{M_n\}_n$  over the probability space  $X$ , the sequence  $\{M_n(x)\}_n$  converges for almost every  $x \in X$ , and the limit function is bounded (see [11, 33]).

*Proof.* [Proof of Theorem D.1] Consider a sequence  $\{(W_n, f_n)\}_{n \in \mathbb{N}} \subset \widetilde{\mathcal{WL}}_r$ , with  $(W_n, f_n) \in \mathcal{WL}_r$ . For each  $k$ , consider the equipartition into  $m_k$  intervals  $\mathcal{I}_{m_k}$ , where  $m_k = 2^{30 \lceil (r^2+1) \rceil k^2}$ . By Corollary C.11, there is a measure preserving bijection  $\phi_{n,k}$  (up to nullset) such that

$$\|(W_n, f_n)^{\phi_{n,k}} - (W_n, f_n)_{\mathcal{I}_{m_k}}^{\phi_{n,k}}\|_{\square; r} < 1/k,$$

where  $(W_n, f_n)_{\mathcal{I}_{m_k}}^{\phi_{n,k}}$  is the projection of  $(W_n, f_n)^{\phi_{n,k}}$  upon  $\mathcal{I}_{m_k}$  (Definition C.10). For every fixed  $k$ , each pair of functions  $(W_n, f_n)_{\mathcal{I}_{m_k}}^{\phi_{n,k}}$  is defined via  $m_k^2 + m_k$  values in  $[0, 1]$ . Hence, since  $[0, 1]^{m_k^2 + m_k}$  is compact, there is a subsequence  $\{n_j^k\}_{j \in \mathbb{N}}$ , such that all of these values converge. Namely, for each  $k$ , the sequence

$$\{(W_{n_j^k}, f_{n_j^k})_{\mathcal{I}_{m_k}}^{\phi_{n_j^k, k}}\}_{j=1}^{\infty}$$

converges pointwise to some step graphon-signal  $(U_k, g_k)$  in  $[\mathcal{WL}_r]_{\mathcal{P}_k}$  as  $j \rightarrow \infty$ . Note that  $\mathcal{I}_{m_l}$  is a refinement of  $\mathcal{I}_{m_k}$  for every  $l > k$ . As a result, by the definition of projection of graphon-signals to partitions, for every  $l > k$ , the value of  $(W_n^{\phi_{n,k}})_{\mathcal{I}_{m_k}}$  at each partition set  $I_{m_k}^i \times I_{m_k}^j$  can be obtained by averaging the values of  $(W_n^{\phi_{n,l}})_{\mathcal{I}_{m_l}}$  at all partition sets  $I_{m_l}^{i'} \times I_{m_l}^{j'}$  that are subsets of  $I_{m_k}^i \times I_{m_k}^j$ . A similar property applies also to the signal. Moreover, by taking limits, it can be shown that the same property holds also for  $(U_k, g_k)$  and  $(U_l, g_l)$ . We now see  $\{(U_k, g_k)\}_{k=1}^{\infty}$  as a sequence of random variables over the standard probability space  $[0, 1]^2$ . The above discussion shows that  $\{(U_k, g_k)\}_{k=1}^{\infty}$  is a bounded martingale. By the martingale convergence theorem, the sequence  $\{(U_k, g_k)\}_{k=1}^{\infty}$  converges almost everywhere pointwise to a limit  $(U, g)$ , which must be in  $\mathcal{WL}_r$ .

Lastly, we show that there exist increasing sequences  $\{k_z \in \mathbb{N}\}_{z=1}^{\infty}$  and  $\{t_z = n_{j_z}^{k_z}\}_{z \in \mathbb{N}}$  such that  $(W_{t_z}, f_{t_z})^{\phi_{t_z, k_z}}$  converges to  $(U, g)$  in cut distance. By the dominant convergence theorem, for each  $z \in \mathbb{N}$  there exists a  $k_z$  such that

$$\|(U, g) - (U_{k_z}, g_{k_z})\|_1 < \frac{1}{3z}.$$

We choose such an increasing sequence  $\{k_z\}_{z \in \mathbb{N}}$  with  $k_z > 3z$ . Similarly, for every  $z \in \mathbb{N}$ , there is a  $j_z$  such that, with the notation  $t_z = n_{j_z}^{k_z}$ ,

$$\|(U_{k_z}, g_{k_z}) - (W_{t_z}, f_{t_z})_{\mathcal{I}_{m_{k_z}}}^{\phi_{t_z, k_z}}\|_1 < \frac{1}{3z},$$

and we may choose the sequence  $\{t_z\}_{z \in \mathbb{N}}$  increasing. Therefore, by the triangle inequality and by the fact that the  $L_1$  norm bounds the cut norm,

$$\begin{aligned} \delta_{\square}((U, g), (W_{t_z}, f_{t_z})) &\leq \|(U, g) - (W_{t_z}, f_{t_z})^{\phi_{t_z, k_z}}\|_{\square} \\ &\leq \|(U, g) - (U_{k_z}, g_{k_z})\|_1 + \|(U_{k_z}, g_{k_z}) - (W_{t_z}, f_{t_z})_{\mathcal{I}_{m_{k_z}}}^{\phi_{t_z, k_z}}\|_1 \\ &\quad + \|(W_{t_z}, f_{t_z})_{\mathcal{I}_{m_{k_z}}}^{\phi_{t_z, k_z}} - (W_{t_z}, f_{t_z})^{\phi_{t_z, k_z}}\|_{\square} \\ &\leq \frac{1}{3z} + \frac{1}{3z} + \frac{1}{3z} \leq \frac{1}{z}. \end{aligned}$$

596

The next theorem bounds the covering number of  $\widetilde{\mathcal{WL}}_r$ .

**Theorem D.2.** Let  $r > 0$  and  $c > 1$ . For every sufficiently small  $\epsilon > 0$ , the space  $\widetilde{\mathcal{WL}}_r$  can be covered by

$$\kappa(\epsilon) = 2^{k^2} \tag{25}$$

balls of radius  $\epsilon$  in cut distance, where  $k = \lceil 2^{2c/\epsilon^2} \rceil$ .

601 *Proof.* Let  $1 < c < c'$  and  $0 < \alpha < 1$ . Given an error tolerance  $\alpha\epsilon > 0$ , using [Theorem C.8](#),  
602 we take the equipartition  $\mathcal{I}_n$  into  $n = 2^{\lceil \frac{2c}{\alpha^2 \epsilon^2} \rceil}$  intervals, for which any graphon-signal  $(W, f) \in$   
603  $\widetilde{\mathcal{WL}}_r$  can be approximated by some  $(W, f)_n$  in  $[\widetilde{\mathcal{WL}}_r]_{\mathcal{I}_n}$ , up to error  $\alpha\epsilon$ . Consider the rectangle  
604  $\mathcal{R}_{n,r} = [0, 1]^{n^2} \times [-r, r]^n$ . We identify each element of  $[\widetilde{\mathcal{WL}}_r]_{\mathcal{I}_n}$  with an element of  $\mathcal{R}_{n,r}$  using  
605 the coefficients of (5). More accurately, the coefficients  $c_{i,j}$  of the step graphon are identifies with the  
606 first  $n^2$  entries of a point in  $\mathcal{R}_{n,r}$ , and the the coefficients  $b_i$  of the step signals are identifies with the  
607 last  $n$  entries of a point in  $\mathcal{R}_{n,r}$ . Now, consider the qunatized rectangle  $\tilde{\mathcal{R}}_{n,r}$ , defined as

$$\tilde{\mathcal{R}}_{n,r} = ((1 - \alpha)\epsilon\mathbb{Z})^{n^2 + 2rn} \cap \mathcal{R}_{n,r}.$$

608 Note that  $\tilde{\mathcal{R}}_n$  consists of

$$M \leq \lceil \frac{1}{(1 - \alpha)\epsilon} \rceil^{n^2 + 2rn} \leq 2^{(-\log((1 - \alpha)\epsilon) + 1)(n^2 + 2rn)}$$

609 points. Now, every point  $x \in \mathcal{R}_{n,r}$  can be approximated by a quantized version  $x_Q \in \tilde{\mathcal{R}}_{n,r}$  up to  
610 error in normalized  $\ell_1$  norm

$$\|x - x_Q\|_1 := \frac{1}{M} \sum_{j=1}^M |x^j - x_Q^j| \leq (1 - \alpha)\epsilon,$$

611 where we re-index the entries of  $x$  and  $x_Q$  in a 1D sequence. Let us denote by  $(W, f)_Q$  the quantized  
612 version of  $(W_n, f_n)$ , given by the above equivalence mapping between  $(W, f)_n$  and  $\mathcal{R}_{n,r}$ . We hence  
613 have

$$\|(W, f) - (W, f)_Q\|_{\square} \leq \|(W, f) - (W_n, f_n)\|_{\square} + \|(W_n, f_n) - (W, f)_Q\|_{\square} \leq \epsilon.$$

614 We now choose the parameter  $\alpha$ . Note that for any  $c' > c$ , there exists  $\epsilon_0 > 0$  that depends on  $c' - c$ ,  
615 such that for any  $\epsilon < \epsilon_0$  there is a choice of  $\alpha$  (close to 1) such that

$$M \leq \lceil \frac{1}{(1 - \alpha)\epsilon} \rceil^{n^2 + 2rn} \leq 2^{(-\log((1 - \alpha)\epsilon) + 1)(n^2 + 2rn)} \leq 2^{k^2}$$

616 where  $k = \lceil 2^{2c'/\epsilon^2} \rceil$ . This is shown similarly to the proof of [Corollary C.7](#) and [Theorem C.8](#). We  
617 now replace the notation  $c' \rightarrow c$ , which concludes the proof.

618 ■

## 619 E Graphon-signal sampling lemmas

620 In this appendix, we prove [Theorem 3.6](#). We denote by  $\mathcal{W}_1$  the space of measurable functions  
621  $U : [0, 1] \rightarrow [-1, 1]$ , and call each  $U \in \mathcal{W}_1$  a kernel.

### 622 E.1 Formal construction of sampled graph-signals

623 Let  $W \in \mathcal{W}_0$  be a graphon, and  $\Lambda' = (\lambda'_1, \dots, \lambda'_k) \in [0, 1]^k$ . We denote by  $W(\Lambda')$  the adjacency  
624 matrix

$$W(\Lambda') = \{W(\lambda'_i, \lambda'_j)\}_{i,j \in [k]}.$$

625 By abuse of notation, we also treat  $W(\Lambda')$  as a weighted graph with  $k$  nodes and the adjacency matrix  
626  $W(\Lambda')$ . We denote by  $\Lambda = (\lambda_1, \dots, \lambda_k) : (\lambda'_1, \dots, \lambda'_k) \mapsto (\lambda_1, \dots, \lambda_k)$  the identity random variable  
627 in  $[0, 1]^k$ . We hence call  $(\lambda_1, \dots, \lambda_k)$  random independent samples from  $[0, 1]$ . We call the random  
628 variable  $W(\Lambda)$  a *random sampled weighted graph*.

629 Given  $f \in \mathcal{L}_r^\infty[0, 1]$  and  $\Lambda' = (\lambda'_1, \dots, \lambda'_k) \in [0, 1]^k$ , we denote by  $f(\Lambda')$  the discrete signal with  
630  $k$  nodes, and value  $f(\lambda'_i)$  for each node  $i = 1, \dots, k$ . We define the *sampled signal* as the random  
631 variable  $f(\Lambda)$ .

632 We then define the random sampled simple graph as follows. First, for a deterministic  $\Lambda' \in [0, 1]^k$ , we  
633 define a 2D array of Bernoulli random variables  $\{e_{i,j}(\Lambda')\}_{i,j \in [k]}$  where  $e_{i,j}(\Lambda') = 1$  in probability

634  $W(\lambda'_i, \lambda'_j)$ , and zero otherwise, for  $i, j \in [k]$ . We define the the probability space  $\{0, 1\}^{k \times k}$  with  
 635 normalized counting measure, defined for any  $S \subset \{0, 1\}^{k \times k}$  by

$$P_{\Lambda'}(S) = \sum_{\mathbf{z} \in S} \prod_{i,j \in [k]} P_{\Lambda';i,j}(z_{i,j}),$$

636 where

$$P_{\Lambda';i,j}(z_{i,j}) = \begin{cases} W(\lambda'_i, \lambda'_j) & \text{if } z_{i,j} = 1 \\ 1 - W(\lambda'_i, \lambda'_j) & \text{if } z_{i,j} = 0. \end{cases}$$

637 We denote the identity random variable by  $\mathbb{G}(W, \Lambda') : \mathbf{z} \mapsto \mathbf{z}$ , and call it a *random simple graph*  
 638 *sampld from*  $W(\Lambda')$ .

639 Next we also allow to “plug” the random variable  $\Lambda$  into  $\Lambda'$ . For that, we define the joint probability  
 640 space  $\Omega = [0, 1]^k \times \{0, 1\}^{k \times k}$  with the product  $\sigma$ -algebra of the Lebesgue sets in  $[0, 1]^k$  with the  
 641 power set  $\sigma$ -algebra of  $\{0, 1\}^{k \times k}$ , with measure, for any measurable  $S \subset \Omega$ ,

$$\mu(S) = \int_{[0,1]^k} P_{\Lambda'}(S(\Lambda')) d\Lambda',$$

642 where

$$S(\Lambda') \subset \{0, 1\}^{k \times k} := \{\mathbf{z} = \{z_{i,j}\}_{i,j \in [k]} \in \{0, 1\}^{k \times k} \mid (\Lambda', \mathbf{z}) \in S\},$$

643 We call the random variable  $\mathbb{G}(W, \Lambda) : \Lambda' \times \mathbf{z} \mapsto \mathbf{z}$  the *random simple graph generated by*  $W$ .  
 644 We extend the domains of the random variables  $W(\Lambda)$ ,  $f(\Lambda)$  and  $\mathbb{G}(W, \Lambda')$  to  $\Omega$  trivially (e.g.,  
 645  $f(\Lambda)(\Lambda', \mathbf{z}) = f(\Lambda)(\Lambda')$  and  $\mathbb{G}(W, \Lambda')(\Lambda', \mathbf{z}) = \mathbb{G}(W, \Lambda')(\mathbf{z})$ ), so that all random variables are  
 646 defined over the same space  $\Omega$ . Note that the random sampled graphs and the random signal share  
 647 the same sample points.

648 Given a kernel  $U \in \mathcal{W}_1$ , we define the random sampled kernel  $U(\Lambda)$  similarly.

649 Similarly to the above construction, given a weighted graph  $H$  with  $k$  nodes and edge weights  $h_{i,j}$ ,  
 650 we define the *simple graph sampled from*  $H$  as the random variable simple graph  $\mathbb{G}(H)$  with  $k$  nodes  
 651 and independent Bernoulli variables  $e_{i,j} \in \{0, 1\}$ , with  $\mathbb{P}(e_{i,j} = 1) = h_{i,j}$ , as the edge weights. The  
 652 following lemma is taken from [23, Equation (10.9)].

653 **Lemma E.1.** *Let  $H$  be a weighted graph of  $k$  nodes. Then*

$$\mathbb{E}(d_{\square}(\mathbb{G}(H), H)) \leq \frac{11}{\sqrt{k}}.$$

654 The following is a simple corollary of Lemma E.1, using the law of total probability.

655 **Corollary E.2.** *Let  $W \in \mathcal{W}_0$  and  $k \in \mathbb{N}$ . Then*

$$\mathbb{E}(d_{\square}(\mathbb{G}(W, \Lambda), W(\Lambda))) \leq \frac{11}{\sqrt{k}}.$$

## 656 E.2 Sampling lemmas of graphon-signals

657 The following lemma, from [23, Lemma 10.6], shows that the cut norm of a kernel is approximated  
 658 by the cut norm of its sample.

**Lemma E.3** (First Sampling Lemma for kernels). *Let  $U \in \mathcal{W}_1$ , and  $\Lambda \in [0, 1]^k$  be uniform  
 independent samples from  $[0, 1]$ . Then, with probability at least  $1 - 4e^{-\sqrt{k}/10}$ ,*

$$-\frac{3}{k} \leq \|U[\Lambda]\|_{\square} - \|U\|_{\square} \leq \frac{8}{k^{1/4}}.$$

659 We derive a version of Lemma E.3 with expected value using the following lemma.

660 **Lemma E.4.** *Let  $z : \Omega \rightarrow [0, 1]$  be a random variable over the probability space  $\Omega$ . Suppose that in  
 661 an event  $\mathcal{E} \subset \Omega$  of probability  $1 - \epsilon$  we have  $z < \alpha$ . Then*

$$\mathbb{E}(z) \leq (1 - \epsilon)\alpha + \epsilon.$$

662 *Proof.*

$$\mathbb{E}(z) = \int_{\Omega} z(x)dx = \int_{\mathcal{E}} z(x)dx + \int_{\Omega \setminus \mathcal{E}} z(x)dx \leq (1 - \epsilon)\alpha + \epsilon.$$

663

664 As a result of this lemma, we have a simple corollary of [Lemma E.3](#).

**Corollary E.5** (First sampling lemma - expected value version). *Let  $U \in \mathcal{W}_1$  and  $\Lambda \in [0, 1]^k$  be chosen uniformly at random, where  $k \geq 1$ . Then*

$$\mathbb{E} \left| \|U[\Lambda]\|_{\square} - \|U\|_{\square} \right| \leq \frac{14}{k^{1/4}}.$$

*Proof.* By [Lemma E.4](#), and since  $6/k^{1/4} > 4e^{-\sqrt{k}/10}$ ,

$$\mathbb{E} \left| \|U[\Lambda]\|_{\square} - \|U\|_{\square} \right| \leq (1 - 4e^{-\sqrt{k}/10}) \frac{8}{k^{1/4}} + 4e^{-\sqrt{k}/10} < \frac{14}{k^{1/4}}.$$

665

666 We note that a version of the first sampling lemma, [Lemma E.3](#), for signals instead of kernels, is just  
 667 a classical Monte Carlo approximation, when working with the  $L_1[0, 1]$  norm, which is equivalent to  
 668 the signal cut norm.

669 **Lemma E.6** (First sampling lemma for signals). *Let  $f \in \mathcal{L}_r^{\infty}[0, 1]$ . Then*

$$\mathbb{E} \left| \|f(\Lambda)\|_1 - \|f\|_1 \right| \leq \frac{r}{k^{1/2}}.$$

670 *Proof.* By standard Monte Carlo theory, since  $r^2$  bounds the variance of  $f(\lambda)$ , where  $\lambda$  is a random  
 671 uniform sample from  $[0, 1]$ , we have

$$\mathbb{V}(\|f(\Lambda)\|_1) = \mathbb{E}(\|f(\Lambda)\|_1 - \|f\|_1)^2 \leq \frac{r^2}{k}.$$

672 Here,  $\mathbb{V}$  denotes variance, and we note that  $\mathbb{E}\|f(\Lambda)\|_1 = \frac{1}{k} \sum_{j=1}^k |f(\lambda_j)| = \|f\|_1$ . Hence, by  
 673 Cauchy Schwarz inequality,

$$\mathbb{E} \left| \|f(\Lambda)\|_1 - \|f\|_1 \right| \leq \sqrt{\mathbb{E}(\|f(\Lambda)\|_1 - \|f\|_1)^2} \leq \frac{r}{k^{1/2}}.$$

674

675 We now extend [\[23, Lemma 10.16\]](#), which bounds the cut distance between a graphon and its sampled  
 676 graph, to the case of a sampled graphon-signal.

677 **Theorem E.7** (Second sampling lemma for graphon signals). *Let  $r > 1$ . Let  $k \geq K_0$ , where  $K_0$  is a  
 678 constant that depends on  $r$ , and let  $(W, f) \in \mathcal{WL}_r$ . Then,*

$$\mathbb{E} \left( \delta_{\square}((W, f), (W(\Lambda), f(\Lambda))) \right) < \frac{15}{\sqrt{\log(k)}},$$

679 and

$$\mathbb{E} \left( \delta_{\square}((W, f), (\mathbb{G}(W, \Lambda), f(\Lambda))) \right) < \frac{15}{\sqrt{\log(k)}}.$$

680 The proof follows the steps of [\[23, Lemma 10.16\]](#) and [\[4\]](#). We note that the main difference in our  
 681 proof is that we explicitly write the measure preserving bijection that optimizes the cut distance.  
 682 While this is not necessary in the classical case, where only a graphon is sampled, in our case we  
 683 need to show that there is a measure preserving bijection that is shared by the graphon and the signal.  
 684 We hence write the proof for completion.

685 *Proof.*

686 Denote a generic error bound, given by the regularity lemma [Theorem C.8](#) by  $\epsilon$ . If we take  $n$  intervals  
 687 in the [Theorem C.8](#), then the error in the regularity lemma will be, for  $c$  such that  $2c = 3$ ,

$$\lceil 3/\epsilon^2 \rceil = \log(n)$$

688 so

$$3/\epsilon^2 + 1 \geq \log(n).$$

689 For small enough  $\epsilon$ , we increase the error bound in the regularity lemma to satisfy

$$4/\epsilon^2 > 3/\epsilon^2 + 1 \geq \log(n).$$

690 More accurately, for the equipartition to intervals  $\mathcal{I}_n$ , there is  $\phi' \in S'_{[0,1]}$  and a piecewise constant  
691 graphon signal  $([W^\phi]_n, [f^\phi]_n)$  such that

$$\|W^{\phi'} - [W^{\phi'}]_n\|_\square \leq \alpha \frac{2}{\sqrt{\log(n)}}$$

692 and

$$\|f^{\phi'} - [f^{\phi'}]_n\|_\square \leq (1 - \alpha) \frac{2}{\sqrt{\log(n)}},$$

693 for some  $0 \leq \alpha \leq 1$ . If we choose  $n$  such that

$$n = \lceil \frac{\sqrt{k}}{r \log(k)} \rceil,$$

694 then an error bound in the regularity lemma is

$$\|W^{\phi'} - [W^{\phi'}]_n\|_\square \leq \alpha \frac{2}{\sqrt{\frac{1}{2} \log(k) - \log(\log(k)) - \log(r)}}$$

695 and

$$\|f^{\phi'} - [f^{\phi'}]_n\|_\square \leq (1 - \alpha) \frac{2}{\sqrt{\frac{1}{2} \log(k) - \log(\log(k)) - \log(r)}},$$

696 for some  $0 \leq \alpha \leq 1$ . Without loss of generality, we suppose that  $\phi'$  is the identity. This only means  
697 that we work with a different representative of  $[(W, f)] \in \mathcal{WL}_r$  throughout the proof. We hence have

$$d_\square(W, W_n) \leq \alpha \frac{2\sqrt{2}}{\sqrt{\log(k) - 2 \log(\log(k)) - 2 \log(r)}}$$

698 and

$$\|f - f_n\|_1 \leq (1 - \alpha) \frac{4\sqrt{2}}{\sqrt{\log(k) - 2 \log(\log(k)) - 2 \log(r)}},$$

699 for some step graphon-signal  $(W_n, f_n) \in [\mathcal{WL}_r]_{\mathcal{I}_n}$ .

700 Now, by the first sampling lemma (Corollary E.5),

$$\mathbb{E}|d_\square(W(\Lambda), W_n(\Lambda)) - d_\square(W, W_n)| \leq \frac{14}{k^{1/4}}.$$

Moreover, by the fact that  $f - f_n \in \mathcal{L}_{2r}^\infty[0, 1]$ , Lemma E.6 implies that

$$\mathbb{E}\|f(\Lambda) - f_n(\Lambda)\|_1 - \|f - f_n\|_1 \leq \frac{2r}{k^{1/2}}.$$

701 Therefore,

$$\begin{aligned} \mathbb{E}\left(d_\square(W(\Lambda), W_n(\Lambda))\right) &\leq \mathbb{E}|d_\square(W(\Lambda), W_n(\Lambda)) - d_\square(W, W_n)| + d_\square(W, W_n) \\ &\leq \frac{14}{k^{1/4}} + \alpha \frac{2\sqrt{2}}{\sqrt{\log(k) - 2 \log(\log(k)) - 2 \log(r)}}. \end{aligned}$$

702 Similarly, we have

$$\begin{aligned} \mathbb{E}\|f(\Lambda) - f_n(\Lambda)\|_1 &\leq \mathbb{E}\|f(\Lambda) - f_n(\Lambda)\|_1 - \|f - f_n\|_1 + \|f - f_n\|_1 \\ &\leq \frac{2r}{k^{1/2}} + (1 - \alpha) \frac{4\sqrt{2}}{\sqrt{\log(k) - 2 \log(\log(k)) - 2 \log(r)}}. \end{aligned}$$

Now, let  $\pi_\Lambda$  be a sorting permutation in  $[k]$ , such that

$$\pi_\Lambda(\Lambda) := \{\Lambda_{\pi_\Lambda^{-1}(i)}\}_{i=1}^k = (\lambda'_1, \dots, \lambda'_k)$$

is a sequence in a non-decreasing order. Let  $\{I_k^i = [i-1, i)/k\}_{i=1}^k$  be the intervals of the equipartition  $\mathcal{I}_k$ . The sorting permutation  $\pi_\Lambda$  induces a measure preserving bijection  $\phi$  that sorts the intervals  $I_k^i$ . Namely, we define, for every  $x \in [0, 1]$ ,

$$\text{if } x \in I_k^i, \quad \phi(x) = J_{i, \pi_\Lambda(i)}(x), \quad (26)$$

where  $J_{i,j} : I_k^i \rightarrow I_k^j$  are defined as  $x \mapsto x - i/k + j/k$ , for all  $x \in I_k^i$ .

By abuse of notation, we denote by  $W_n(\Lambda)$  and  $f_n(\Lambda)$  the induced graphon and signal from  $W_n(\Lambda)$  and  $f_n(\Lambda)$  respectively. Hence,  $W_n(\Lambda)^\phi$  and  $f_n(\Lambda)^\phi$  are well defined. Note that the graphons  $W_n$  and  $W_n(\Lambda)^\phi$  are stepfunctions, where the set of values of  $W_n(\Lambda)^\phi$  is a subset of the set of values of  $W_n$ . Intuitively, since  $k \gg m$ , we expect the partition  $\{[\lambda'_i, \lambda'_{i+1})\}_{i=1}^k$  to be “close to a refinement” of  $\mathcal{I}_n$  in high probability. Also, we expect the two sets of values of  $W_n(\Lambda)^\phi$  and  $W_n$  to be identical in high probability. Moreover, since  $\Lambda'$  is sorted, when inducing a graphon from the graph  $W_n(\Lambda)$  and “sorting” it to  $W_n(\Lambda)^\phi$ , we get a graphon that is roughly “aligned” with  $W_n$ . The same philosophy also applied to  $f_n$  and  $f_n(\Lambda)^\phi$ . We next formalize these observations.

For each  $i \in [n]$ , let  $\lambda'_{j_i}$  be the smaller point of  $\Lambda'$  that is in  $I_n^i$ , set  $j_i = j_{i+1}$  if  $\Lambda' \cap I_n^i = \emptyset$ , and set  $j_{n+1} = k + 1$ . For every  $i = 1, \dots, n$ , we call

$$J_i := [j_i - 1, j_{i+1} - 1)/k$$

the  $i$ -th step of  $W_n(\Lambda)^\phi$  (which can be the empty set). Let  $a_i = \frac{j_i - 1}{k}$  be the left edge point of  $J_i$ . Note that  $a_i = |\Lambda \cap [0, i/n)|/k$  is distributed binomially (up to the normalization  $k$ ) with  $k$  trials and success in probability  $i/n$ .

$$\begin{aligned} \|W_n - W_n(\Lambda)^\phi\|_\square &\leq \|W_n - W_n(\Lambda)^\phi\|_1 \\ &= \sum_i \sum_k \int_{I_n^i \cap J_i} \int_{I_n^k \cap J_k} |W_n(x, y) - W_n(\Lambda)^\phi(x, y)| dx dy \\ &\quad + \sum_i \sum_{j \neq i} \sum_k \sum_{l \neq k} \int_{I_n^i \cap J_j} \int_{I_n^k \cap J_l} |W_n(x, y) - W_n(\Lambda)^\phi(x, y)| dx dy \\ &= \sum_i \sum_{j \neq i} \sum_k \sum_{l \neq k} \int_{I_n^i \cap J_j} \int_{I_n^k \cap J_l} |W_n(x, y) - W_n(\Lambda)^\phi(x, y)| dx dy \\ &= \sum_i \sum_k \int_{I_n^i \setminus J_i} \int_{I_n^k \setminus J_k} |W_n(x, y) - W_n(\Lambda)^\phi(x, y)| dx dy \\ &\leq \sum_i \sum_k \int_{I_n^i \setminus J_i} \int_{I_n^k \setminus J_k} 1 dx dy \leq 2 \sum_i \int_{I_n^i \setminus J_i} 1 dx dy \\ &\leq 2 \sum_i (|i/n - a_i| + |(i+1)/n - a_{i+1}|). \end{aligned}$$

Hence,

$$\begin{aligned} \mathbb{E}\|W_n - W_n(\Lambda)^\phi\|_\square &\leq 2 \sum_i (\mathbb{E}|i/n - a_i| + \mathbb{E}|(i+1)/n - a_{i+1}|) \\ &\leq 2 \sum_i \left( \sqrt{\mathbb{E}(i/n - a_i)^2} + \sqrt{\mathbb{E}((i+1)/n - a_{i+1})^2} \right) \end{aligned}$$

By properties of the binomial distribution, we have  $\mathbb{E}(ka_i) = ik/n$ , so

$$\mathbb{E}(ik/n - ka_i)^2 = \mathbb{V}(ka_i) = k(i/n)(1 - i/n).$$

As a result

$$\begin{aligned} \mathbb{E}\|W_n - W_n(\Lambda)^\phi\|_\square &\leq 5 \sum_{i=1}^n \sqrt{\frac{(i/n)(1 - i/n)}{k}} \\ &\leq 2 \int_1^n \sqrt{\frac{(i/n)(1 - i/n)}{k}} di, \end{aligned}$$

724 and for  $n > 10$ ,

$$\leq 5 \frac{n}{\sqrt{k}} \int_0^{1.1} \sqrt{z - z^2} dz \leq 5 \frac{n}{\sqrt{k}} \int_0^{1.1} \sqrt{z} dz \leq 10/3(1.1)^{3/2} \frac{n}{\sqrt{k}} < 4 \frac{n}{\sqrt{k}}.$$

725 Now, by  $n = \lceil \frac{\sqrt{k}}{r \log(k)} \rceil \leq \frac{\sqrt{k}}{r \log(k)} + 1$ , for large enough  $k$ ,

$$\mathbb{E} \|W_n - W_n(\Lambda)^\phi\|_\square \leq 4 \frac{1}{r \log(k)} + 4 \frac{1}{\sqrt{k}} \leq \frac{5}{r \log(k)}.$$

726 Similarly,

$$\mathbb{E} \|f_n - f_n(\Lambda)^\phi\|_1 \leq \frac{5}{\log(k)}.$$

727 Note that in the proof of [Corollary C.7](#), in (18),  $\alpha$  is chosen close to 1, and especially, for small  
728 enough  $\epsilon$ ,  $\alpha > 1/2$ . Hence, for large enough  $k$ ,

$$\begin{aligned} \mathbb{E}(d_\square(W, W(\Lambda)^\phi)) &\leq d_\square(W, W_n) + \mathbb{E}(d_\square(W_n, W_n(\Lambda)^\phi)) + \mathbb{E}(d_\square(W_n(\Lambda), W(\Lambda))) \\ &\leq \alpha \frac{2\sqrt{2}}{\sqrt{\log(k) - 2 \log(\log(k)) - 2 \log(r)}} + \frac{5}{r \log(k)} + \frac{14}{k^{1/4}} \\ &\quad + \alpha \frac{2\sqrt{2}}{\sqrt{\log(k) - 2 \log(\log(k)) - 2 \log(r)}} \\ &\leq \alpha \frac{6}{\sqrt{\log(k)}}, \end{aligned}$$

729 Similarly, for each  $k$ , if  $1 - \alpha < \frac{1}{\sqrt{\log(k)}}$ , then

$$\begin{aligned} \mathbb{E}(d_\square(f, f(\Lambda)^\phi)) &\leq (1 - \alpha) \frac{2\sqrt{2}}{\sqrt{\log(k) - 2 \log(\log(k)) - 2 \log(r)}} + \frac{5}{\log(k)} \\ &\quad + \frac{2r}{k^{1/2}} + (1 - \alpha) \frac{4\sqrt{2}}{\sqrt{\log(k) - 2 \log(\log(k)) - 2 \log(r)}} \leq \frac{14}{\log(k)}. \end{aligned}$$

730 Moreover, for each  $k$  such that  $1 - \alpha > \frac{1}{\sqrt{\log(k)}}$ , if  $k$  is large enough (where the lower bound of  $k$   
731 depends on  $r$ ), we have

$$\frac{5}{\log(k)} + \frac{2r}{k^{1/2}} < \frac{5.5}{\log(k)} < \frac{1}{\sqrt{\log(k)}} \frac{6}{\sqrt{\log(k)}} < (1 - \alpha) \frac{6}{\sqrt{\log(k)}}$$

732 so, by  $6\sqrt{2} < 9$ ,

$$\begin{aligned} \mathbb{E}(d_\square(f, f(\Lambda)^\phi)) &\leq (1 - \alpha) \frac{2\sqrt{2}}{\sqrt{\log(k) - 2 \log(\log(k)) - 2 \log(r)}} + \frac{2}{\log(k)} \\ &\quad + \frac{2r}{k^{1/2}} + (1 - \alpha) \frac{4\sqrt{2}}{\sqrt{\log(k) - 2 \log(\log(k)) - 2 \log(r)}} \\ &\leq (1 - \alpha) \frac{15}{\sqrt{\log(k)}}. \end{aligned}$$

733 Lastly, by [Corollary E.2](#),

$$\begin{aligned} \mathbb{E}(d_\square(W, \mathbb{G}(W, \Lambda)^\phi)) &\leq \mathbb{E}(d_\square(W, W(\Lambda)^\phi)) + \mathbb{E}(d_\square(W(\Lambda)^\phi, \mathbb{G}(W, \Lambda)^\phi)) \\ &\leq \alpha \frac{6}{\sqrt{\log(k)}} + \frac{11}{\sqrt{k}} \leq \alpha \frac{7}{\sqrt{\log(k)}}, \end{aligned}$$

734 As a result, for large enough  $k$ ,

$$\mathbb{E}\left(\delta_{\square}((W, f), (W(\Lambda), f(\Lambda)))\right) < \frac{15}{\sqrt{\log(k)}},$$

735 and

$$\mathbb{E}\left(\delta_{\square}((W, f), (\mathbb{G}(W, \Lambda), f(\Lambda)))\right) < \frac{15}{\sqrt{\log(k)}}.$$

736

■

## 737 F Graphon-signal MPNNs

738 In this appendix we give properties and examples of MPNNs.

### 739 F.1 Properties of graphon-signal MPNNs

740 Consider the construction of MPNN from [Section 4.1](#). We first explain how a MPNN on a graph is  
741 equivalent to a MPNN on the induced graphon.

742 Let  $G$  be a graph of  $n$  nodes, with adjacency matrix  $A = \{a_{i,j}\}_{i,j \in [n]}$  and signal  $\mathbf{f} \in \mathbb{R}^{n \times d}$ . Consider  
743 a MPL  $\theta$ , with receiver and transmitter message functions  $\xi_r^k, \xi_t^k : \mathbb{R}^d \rightarrow \mathbb{R}^p$ , for  $k \in [K]$ , where  
744  $K \in \mathbb{N}$ , and update function  $\mu : \mathbb{R}^{d+p} \rightarrow \mathbb{R}^s$ . The application of the MPL on  $(G, \mathbf{f})$  is defined as  
745 follows. We first define the message kernel  $\Phi_{\mathbf{f}} : [n]^2 \rightarrow \mathbb{R}^p$ , with entries

$$\Phi_{\mathbf{f}}(i, j) = \Phi(\mathbf{f}_i, \mathbf{f}_j) = \sum_{k=1}^K \xi_r^k(\mathbf{f}_i) \xi_t^k(\mathbf{f}_j).$$

746 We then aggregate the message kernel with normalized sum aggregation

$$(\text{Agg}(G, \Phi_{\mathbf{f}}))_i = \frac{1}{n} \sum_{j \in [n]} a_{i,j} \Phi_{\mathbf{f}}(i, j).$$

747 Lastly, we apply the update function, to obtain the output  $\theta(G, \mathbf{f})$  of the MPL with value at each node  
748  $i$

$$\theta(G, \mathbf{f})_i = \eta(\mathbf{f}_i, (\text{Agg}(G, \Phi_{\mathbf{f}}))_i) \in \mathbb{R}^s.$$

749 **Lemma F.1.** *Consider a MPL  $\theta$  as in the above setting. Then, for every graph signal  $(G, A, \mathbf{f})$ ,*

$$\theta\left((W, f)_{(G, \mathbf{f})}\right) = (W, f)_{\theta(G, \mathbf{f})}.$$

750 *Proof.* Let  $\{I_i, \dots, I_n\}$  be the equipartition to intervals. For each  $j \in [n]$ , let  $y_j \in I_j$  be an arbitrary  
751 point. Let  $i \in [n]$  and  $x \in I_i$ . We have

$$\begin{aligned} \text{Agg}(G, \Phi_{\mathbf{f}})_i &= \frac{1}{n} \sum_{j \in [n]} a_{i,j} \Phi_{\mathbf{f}}(i, j) = \frac{1}{n} \sum_{j \in [n]} W_G(x, y_j) \Phi_{\mathbf{f}}(x, y_j) \\ &= \int_0^1 W_G(x, y) \Phi_{\mathbf{f}}(x, y) dy = \text{Agg}(W_G, \Phi_{\mathbf{f}})(x). \end{aligned}$$

752 Therefore, for every  $i \in [n]$  and every  $x \in I_i$ ,

$$\begin{aligned} f_{\theta(G, \mathbf{f})}(x) &= f_{\eta(\mathbf{f}, \text{Agg}(G, \Phi_{\mathbf{f}}))}(x) = \eta(\mathbf{f}_i, \text{Agg}(G, \Phi_{\mathbf{f}})_i) \\ &= \eta(f_{\mathbf{f}}(x), \text{Agg}(W_G, \Phi_{\mathbf{f}})(x)) = \theta(W_G, f_{\mathbf{f}})(x). \end{aligned}$$

753

■

## 754 F.2 Examples of MPNNs

755 The GIN convolutional layer [34] is defined as follows. First, the message function is

$$\Phi(a, b) = b$$

756 and the update function is

$$\eta(x, y) = M((1 + \epsilon)x + y).$$

757 where  $M$  is a multi-layer perceptron (MLP) and  $\epsilon$  a constant. Each layer may have a different MLP  
758 and different constant  $\epsilon$ . The standard GIN is defined with sum aggregation, but we use normalized  
759 sum aggregation.

760 Given a graph-signal  $(G, \mathbf{f})$ , with  $\mathbf{f} \in \mathbb{R}^{n \times d}$  with adjacency matrix  $A \in \mathbb{R}^{n \times n}$ , a spectral convo-  
761 lutional layer based on a polynomial filter  $p(\lambda) = \sum_{j=0}^J \lambda^j C_j$ , where  $C_j \in \mathbb{R}^{d \times p}$ , is defined to  
762 be

$$p(A)\mathbf{f} = \sum_{j=0}^J A^j \mathbf{f} C_j,$$

763 followed by a pointwise non-linearity like ReLU. Such a convolutional layer can be seen as  $J + 1$   
764 MPLs. We first apply  $J$  MPLs, where each MPL is of the form

$$\theta(\mathbf{f}) = (\mathbf{f}, A\mathbf{f}).$$

765 We then apply an update layer

$$U(\mathbf{f}) = \mathbf{f}C$$

766 for some  $C \in \mathbb{R}^{(J+1)d \times p}$ , followed by the pointwise non-linearity. The message part of  $\theta$  can be  
767 written in our formulation with  $\Phi(a, b) = b$ , and the update part of  $\theta$  with  $\eta(c, d) = (c, d)$ . The last  
768 update layer  $U$  is linear followed by the pointwise non-linearity.

## 769 G Lipschitz continuity of MPNNs

770 In this appendix we prove [Theorem 4.1](#). For  $v \in \mathbb{R}^d$ , we often denote by  $|v| = \|v\|_\infty$ . We define the  
771  $L_1$  norm of a measurable function  $h : [0, 1] \rightarrow \mathbb{R}^d$  by

$$\|h\|_1 := \int_0^1 |h(x)| dx = \int_0^1 \|h(x)\|_\infty dx.$$

772 Similarly,

$$\|h\|_\infty := \sup_{x \in \mathbb{R}^d} |h(x)| = \sup_{x \in \mathbb{R}^d} \|h(x)\|_\infty.$$

773 We define Lipschitz continuity with respect to the infinity norm. Namely,  $Z : \mathbb{R}^d \rightarrow \mathbb{R}^c$  is called  
774 Lipschitz continuous with Lipschitz constant  $L$  if

$$|Z(x) - Z(y)| = \|Z(x) - Z(y)\|_\infty \leq L\|x - z\|_\infty = L|x - z|.$$

775 We denote the minimal Lipschitz bound of the function  $Z$  by  $L_Z$ .

776 We extend  $\mathcal{L}_r^\infty[0, 1]$  to the space of functions  $f : [0, 1] \rightarrow \mathbb{R}^d$  with the above  $L_1$  norm.

777 Define the space  $\mathcal{K}_q$  of *kernels* bounded by  $q > 0$  to be the space of measurable functions

$$K : [0, 1]^2 \rightarrow [-q, q].$$

778 The cut norm, cut metric, and cut distance are defined as usual for kernels in  $\mathcal{K}_q$ .

### 779 G.1 Lipschitz continuity of message passing and update layers

780 In this subsection we prove that message passing layers and update layers are Lipschitz continuous  
781 with respect to the graphon-signal cut metric.

782 **Lemma G.1** (Product rule for message kernels). *Let  $\Phi_f, \Phi_g$  be the message kernels corresponding*  
783 *to the signals  $f, g$ . Then*

$$\|\Phi_f - \Phi_g\|_{L^1[0,1]^2} \leq \sum_{k=1}^K \left( L_{\xi_r^k} \|\xi_t^k\|_\infty + \|\xi_r^k\|_\infty L_{\xi_t^k} \right) \|f - g\|_1.$$

784 *Proof.* Suppose  $p = 1$  For every  $x, y \in [0, 1]^2$

$$\begin{aligned}
|\Phi_f(x, y) - \Phi_g(x, y)| &= \left| \sum_{k=1}^K \xi_r^k(f(x)) \xi_t^k(f(y)) - \sum_{k=1}^K \xi_r^k(g(x)) \xi_t^k(g(y)) \right| \\
&\leq \sum_{k=1}^K |\xi_r^k(f(x)) \xi_t^k(f(y)) - \xi_r^k(g(x)) \xi_t^k(g(y))| \\
&\leq \sum_{k=1}^K \left( |\xi_r^k(f(x)) \xi_t^k(f(y)) - \xi_r^k(g(x)) \xi_t^k(f(y))| + |\xi_r^k(g(x)) \xi_t^k(f(y)) - \xi_r^k(g(x)) \xi_t^k(g(y))| \right) \\
&\leq \sum_{k=1}^K \left( L_{\xi_r^k} |f(x) - g(x)| |\xi_t^k(f(y))| + |\xi_r^k(g(x))| L_{\xi_t^k} |f(y) - g(y)| \right).
\end{aligned}$$

785 Hence,

$$\begin{aligned}
&\|\Phi_f - \Phi_g\|_{L^1[0,1]^2} \\
&\leq \sum_{k=1}^K \int_0^1 \int_0^1 \left( L_{\xi_r^k} |f(x) - g(x)| |\xi_t^k(f(y))| + |\xi_r^k(g(x))| L_{\xi_t^k} |f(y) - g(y)| \right) dx dy \\
&\leq \sum_{k=1}^K \left( L_{\xi_r^k} \|f - g\|_1 \|\xi_t^k\|_\infty + \|\xi_r^k\|_\infty L_{\xi_t^k} \|f - g\|_1 \right) \\
&= \sum_{k=1}^K \left( L_{\xi_r^k} \|\xi_t^k\|_\infty + \|\xi_r^k\|_\infty L_{\xi_t^k} \right) \|f - g\|_1.
\end{aligned}$$

786

787 **Lemma G.2.** Let  $Q, V$  be two message kernels, and  $W \in \mathcal{W}_0$ . Then

$$\|\text{Agg}(W, Q) - \text{Agg}(W, V)\|_1 \leq \|Q - V\|_1.$$

788 *Proof.*

$$\text{Agg}(W, Q)(x) - \text{Agg}(W, V)(x) = \int_0^1 W(x, y)(Q(x, y) - V(x, y)) dy$$

789 So

$$\begin{aligned}
\|\text{Agg}(W, Q) - \text{Agg}(W, V)\|_1 &= \int_0^1 \left| \int_0^1 W(x, y)(Q(x, y) - V(x, y)) dy \right| dx \\
&\leq \int_0^1 \int_0^1 |W(x, y)(Q(x, y) - V(x, y))| dy dx \\
&\leq \int_0^1 \int_0^1 |(Q(x, y) - V(x, y))| dy dx = \|Q - V\|_1.
\end{aligned}$$

790

791 As a result of [Lemma G.2](#) and the product rule [Lemma G.1](#), we have the following corollary, that  
792 computes the error in aggregating two message kernels with the same graphon.

**Corollary G.3.**

$$\|\text{Agg}(W, \Phi_f) - \text{Agg}(W, \Phi_g)\|_1 \leq \sum_{k=1}^K \left( L_{\xi_r^k} \|\xi_t^k\|_\infty + \|\xi_r^k\|_\infty L_{\xi_t^k} \right) \|f - g\|_1.$$

793 Next we fix the message kernel, and bound the difference between the aggregation of the message  
794 kernel with respect to two different graphons. Let  $L^+[0, 1]$  be the space of measurable function  
795  $f : [0, 1] \rightarrow [0, 1]$ . The following lemma is a trivial extension of [\[23, Lemma 8.10\]](#) from  $\mathcal{K}_1$  to  $\mathcal{K}_r$ .

796 **Lemma G.4.** For any kernel  $Q \in \mathcal{K}_r$

$$\|Q\|_{\square} = \sup_{f, g \in L^+[0,1]} \left| \int_{[0,1]^2} f(x)Q(x,y)g(y)dxdy \right|,$$

797 where the supremum is attained for some  $f, g \in L^+[0,1]$ .

798 The following Lemma is proven as part of the proof of [23, Lemma 8.11].

799 **Lemma G.5.** For any kernel  $Q \in \mathcal{K}_r$

$$\sup_{f, g \in L_1^{\infty}[0,1]} \left| \int_{[0,1]^2} f(x)Q(x,y)g(y)dxdy \right| \leq 4\|Q\|_{\square}.$$

800 For completeness, we give here a self-contained proof.

801 *Proof.* Any function  $f \in L_1^{\infty}[0,1]$  can be written as  $f = f_+ - f_-$ , where  $f_+, f_- \in L^+[0,1]$ . Hence,  
802 by Lemma G.4,

$$\begin{aligned} & \sup_{f, g \in L_1^{\infty}[0,1]} \left| \int_{[0,1]^2} f(x)Q(x,y)g(y)dxdy \right| \\ &= \sup_{f_+, f_-, g_+, g_- \in L^+[0,1]} \left| \int_{[0,1]^2} (f_+(x) - f_-(x))Q(x,y)(g_+(y) - g_-(y))dxdy \right| \\ &\leq \sum_{s \in \{+, -\}} \sup_{f_s, g_s \in L^+[0,1]} \left| \int_{[0,1]^2} f_s(x)Q(x,y)g_s(y)dxdy \right| = 4\|Q\|_{\square}. \end{aligned}$$

803 ■

804 Next we state a simple lemma.

805 **Lemma G.6.** Let  $f = f_+ - f_-$  be a signal, where  $f_+, f_- : [0,1] \rightarrow (0, \infty)$  are measurable. Then  
806 the supremum in the cut norm  $\|f\|_{\square} = \sup_{S \subset [0,1]} \left| \int_S f(x)dx \right|$  is attained as the support of either  $f_+$   
807 or  $f_-$ .

808 **Lemma G.7.** Let  $f \in \mathcal{L}_2^{\infty}[0,1]$ ,  $W, V \in \mathcal{W}_0$ , and suppose that  $|\xi_r^k(f(x))|, |\xi_t^k(f(x))| \leq \rho$  for  
809 every  $x \in [0,1]$  and  $k = 1, \dots, K$ . Then

$$\|\text{Agg}(W, \Phi_f) - \text{Agg}(V, \Phi_f)\|_{\square} \leq 4K\rho^2\|W - V\|_{\square}.$$

810 Moreover, if  $\xi_r^k$  and  $\xi_t^k$  are non-negatively valued for every  $k = 1, \dots, K$ , then

$$\|\text{Agg}(W, \Phi_f) - \text{Agg}(V, \Phi_f)\|_{\square} \leq K\rho^2\|W - V\|_{\square}.$$

811 *Proof.* Let  $T = W - V$ . Let  $S$  be the minimizer of the infimum underlying the cut norm of  
812  $\text{Agg}(T, \Phi_f)$ . Suppose without loss of generality that  $\int_S \text{Agg}(T, \Phi_f)(x)dx > 0$ . Denote  $q_r^k(x) =$   
813  $\xi_r^k(f(x))$  and  $q_t^k(x) = \xi_t^k(f(x))$ . We have

$$\begin{aligned} \int_S (\text{Agg}(W, \Phi_f)(x) - \text{Agg}(V, \Phi_f)(x))dx &= \int_S \text{Agg}(T, \Phi_f)(x)dx \\ &= \sum_{k=1}^K \int_S \int_0^1 q_r^k(x)T(x,y)q_t^k(y)dydx. \end{aligned}$$

814 Let

$$v_r^k(x) = \begin{cases} q_r^k(x)/\rho & x \in S \\ 0 & x \notin S. \end{cases} \quad (27)$$

815 Moreover, define  $v_t^k = q_t^k/\rho$ , and note that  $v_r^k, v_t^k \in L_1^{\infty}[0,1]$ . We hence have, by Lemma G.5,

$$\begin{aligned} \int_S \text{Agg}(T, \Phi_f)(x)dx &= \sum_{k=1}^K \rho^2 \int_0^1 \int_0^1 v_r^k(x)T(x,y)v_t^k(y)dydx \\ &\leq \sum_{k=1}^K \rho^2 \left| \int_0^1 \int_0^1 v_r^k(x)T(x,y)v_t^k(y)dydx \right| \\ &\leq 4K\rho^2\|T\|_{\square}. \end{aligned}$$

816 Hence,

$$\|\text{Agg}(W, \Phi_f) - \text{Agg}(V, \Phi_f)\|_{\square} \leq 4K\rho^2\|T\|_{\square}$$

817 Lastly, in case  $\xi_r^k, \xi_t^k$  are nonnegatively valued, so are  $q_r^k, q_t^k$ , and hence by [Lemma G.4](#),

$$\int_S \text{Agg}(T, \Phi_f)(x)dx \leq K\rho^2\|T\|_{\square}.$$

818

819 **Theorem G.8.** *Let  $(W, f), (V, g) \in \mathcal{WL}_r$ , and suppose that  $|\xi_r^k(f(x))|, |\xi_t^k(f(x))| \leq \rho$  and*  
 820  *$L_{\xi_t^k}, L_{\xi_r^k} < L$  for every  $x \in [0, 1]$  and  $k = 1, \dots, K$ . Then,*

$$\|\text{Agg}(W, \Phi_f) - \text{Agg}(V, \Phi_g)\|_{\square} \leq 4KL\rho\|f - g\|_{\square} + 4K\rho^2\|W - V\|_{\square}.$$

821 *Proof.* By [Lemma G.1](#), [Lemma G.2](#) and [Lemma G.7](#),

$$\begin{aligned} & \|\text{Agg}(W, \Phi_f) - \text{Agg}(V, \Phi_g)\|_{\square} \\ & \leq \|\text{Agg}(W, \Phi_f) - \text{Agg}(W, \Phi_g)\|_{\square} + \|\text{Agg}(W, \Phi_g) - \text{Agg}(V, \Phi_g)\|_{\square} \\ & \leq \sum_{k=1}^K \left( L_{\xi_r^k} \|\xi_t^k\|_{\infty} + \|\xi_r^k\|_{\infty} L_{\xi_t^k} \right) \|f - g\|_1 + 4K\rho^2\|W - V\|_{\square} \\ & \leq 4KL\rho\|f - g\|_{\square} + 4K\rho^2\|W - V\|_{\square}. \end{aligned}$$

822

823 Lastly, we show that update layers are Lipschitz continuous. Since the update function takes two  
 824 functions  $f : [0, 1] \rightarrow \mathbb{R}^{d_i}$  (for generally two different output dimensions  $d_1, d_2$ ), we “concatenate”  
 825 these two inputs and treat it as one input  $f : [0, 1] \rightarrow \mathbb{R}^{d_1+d_2}$ .

826 **Lemma G.9.** *Let  $\eta : \mathbb{R}^{d+p} \rightarrow \mathbb{R}^s$  be Lipschitz with Lipschitz constant  $L_{\eta}$ , and let  $f, g \in \mathcal{L}_r^{\infty}[0, 1]$*   
 827 *with values in  $\mathbb{R}^{d+p}$  for some  $d, p \in \mathbb{N}$ .*

828 Then

$$\|\eta(f) - \eta(g)\|_1 \leq L_{\eta}\|f - g\|_1.$$

829 *Proof.*

$$\begin{aligned} \|\eta(f) - \eta(g)\|_1 &= \int_0^1 |\eta(f(x)) - \eta(g(x))| dx \\ &\leq \int_0^1 L_{\eta} |f(x) - g(x)| dx = L_{\eta}\|f - g\|_1. \end{aligned}$$

830

## 831 G.2 Bounds of signals and MPLs with Lipschitz message and update functions

832 We will consider three settings for the MPNN Lipschitz bounds. In all setting, the transmitter, receiver,  
 833 and update functions are Lipschitz. In the first setting all message and update functions are assumed  
 834 to be bounded. In the second setting, there is no additional assumption over Lipschitzness of the  
 835 transmitter, receiver, and update functions. In the third setting, we assume that the message function  
 836  $\Phi$  is also Lipschitz with Lipschitz bound  $L_{\Phi}$ , and that all receiver and transmitter functions are  
 837 non-negatively bounded (e.g., via an application of ReLU or sigmoid in their implementation). Note  
 838 that in case  $K = 1$  and all functions are differentiable, by the product rule,  $\Phi$  can be Lipschitz only  
 839 in two cases: if both  $\xi_r$  and  $\xi_t$  are bounded and Lipschitz, or if either  $\xi_r$  or  $\xi_t$  is constant, and the  
 840 other function is Lipschitz. When  $K > 1$ , we can have combinations of these cases.

841 We next derive bounds for the different settings. A bound for setting 1 is given in [Theorem G.8](#).  
 842 Moreover, When the receiver and transmitter message functions and the update functions are bounded,  
 843 so is the signal at each layer.

844 **Bounds for setting 2.**

845 Next we show boundedness when the receiver and transmitter message and update functions are only  
846 assumed to be Lipschitz.

847 Define the *formal bias*  $B_\xi$  of a function  $\xi : \mathbb{R}^{d_1} \rightarrow \mathbb{R}^{d_2}$  to be  $\xi(0)$  [25]. We note that the formal bias  
848 of an affine-linear operator is its classical bias.

849 **Lemma G.10.** *Let  $(W, f) \in \mathcal{WL}_r$ , and suppose that for every  $y \in \{\mathbf{r}, \mathbf{t}\}$  and  $k = 1, \dots, K$*

$$|\xi_y^k(0)| \leq B, \quad L_{\xi_y^k} < L.$$

850 *Then,*

$$\|\xi_y^k \circ f\|_\infty \leq Lr + B$$

851 *and*

$$\|\text{Agg}(W, \Phi_f)\|_\infty \leq K(Lr + B)^2.$$

852 *Proof.* Let  $y \in \{\mathbf{r}, \mathbf{t}\}$ . We have

$$|\xi_y^k(f(x))| \leq |\xi_y^k(f(x)) - \xi_y^k(0)| + B \leq L_{\xi_y^k} |f(x)| + B \leq Lr + B,$$

853 *so,*

$$\begin{aligned} |\text{Agg}(W, \Phi_f)(x)| &= \left| \sum_{k=1}^K \int_0^1 \xi_r^k(f(x)) W(x, y) \xi_t^k(f(y)) dy \right| \\ &\leq K(Lr + B)^2. \end{aligned}$$

854

855 Next, we have a direct result of [Theorem G.8](#).

856 **Corollary G.11.** *Suppose that for every  $y \in \{\mathbf{r}, \mathbf{t}\}$  and  $k = 1, \dots, K$*

$$|\xi_y^k(0)| \leq B, \quad L_{\xi_y^k} < L.$$

857 *Then, for every  $(W, f), (V, g) \in \mathcal{WL}_r$ ,*

$$\|\text{Agg}(W, \Phi_f) - \text{Agg}(V, \Phi_g)\|_\square \leq 4K(L^2r + LB)\|f - g\|_\square + 4K(Lr + B)^2\|W - V\|_\square.$$

858 **Bound for setting 3.**

859 **Lemma G.12.** *Let  $(W, f) \in \mathcal{WL}_r$ , and suppose that*

$$|\Phi(0, 0)| < B, \quad L_\Phi < L.$$

860 *Then,*

$$\|\Phi_f\|_\infty \leq Lr + B$$

861 *and*

$$\|\text{Agg}(W, \Phi_f)\|_\infty \leq Lr + B.$$

862 *Proof.* We have

$$|\Phi(f(x), f(y))| \leq |\Phi(f(x), f(y)) - \Phi(0, 0)| + B \leq L_\Phi |(f(x), f(y))| + B \leq Lr + B,$$

863 *so,*

$$\begin{aligned} |\text{Agg}(W, \Phi_f)(x)| &= \left| \int_0^1 W(x, y) \Phi(f(x), f(y)) dy \right| \\ &\leq Lr + B. \end{aligned}$$

864

865 **Additional bounds.**

866 **Lemma G.13.** *Let  $f$  be a signal,  $W, V \in \mathcal{W}_0$ , and suppose that  $\|\Phi_f\|_\infty \leq \rho$  for every  $k = 1, \dots, K$ ,  
867 and that  $\xi_r^k$  and  $\xi_t^k$  are non-negatively valued. Then*

$$\|\text{Agg}(W, \Phi_f) - \text{Agg}(V, \Phi_f)\|_\square \leq K\rho\|W - V\|_\square.$$

868 *Proof.* The proof follows the steps of [Lemma G.7](#) until (27), from where we proceed differently. Since  
869 all of the functions  $q_r^k$  and  $q_t^k$ ,  $k \in [K]$ , and since  $\|\Phi_f\|_\infty \leq \rho$ , the product of each  $q_r^k(x)q_t^k(y)$  must  
870 be also bounded by  $\rho$  for every  $x \in [0, 1]$  and  $k \in [K]$ . Hence, we may replace the normalization in  
871 (27) with

$$v_r^k(x) = \begin{cases} q_r^k(x)/\rho_r^k & x \in S \\ 0 & x \notin S \end{cases}, \quad v_t^k(y) = \begin{cases} q_t^k(y)/\rho_t^k & y \in S \\ 0 & y \notin S \end{cases},$$

872 where for every  $k \in [K]$ ,  $\rho_r^k \rho_t^k = \rho$ . This guarantees that  $v_r^k, v_t^k \in L_1^\infty[0, 1]$ . Hence,

$$\int_S \text{Agg}(T, \Phi_f)(x) dx = \sum_{k=1}^K \int_0^1 \int_0^1 \rho_r^k v_r^k(x) T(x, y) \rho_t^k v_t^k(y) dy dx$$

873

$$\leq \sum_{k=1}^K \rho \left| \int_0^1 \int_0^1 v_r^k(x) T(x, y) v_t^k(y) dy dx \right| \leq K\rho\|T\|_\square.$$

874

875 **Theorem G.14.** *Let  $(W, f), (V, g) \in \mathcal{WL}_r$ , and suppose that  $\|\Phi\|_\infty, \|\xi_r^k\|_\infty, \|\xi_t^k\|_\infty \leq \rho$ , all  
876 message functions  $\xi$  are non-negative valued, and  $L_{\xi_t^k}, L_{\xi_r^k} < L$ , for every  $k = 1, \dots, K$ . Then,*

$$\|\text{Agg}(W, \Phi_f) - \text{Agg}(V, \Phi_g)\|_\square \leq 4KL\rho\|f - g\|_\square + K\rho\|W - V\|_\square.$$

877 The proof follows the steps of [Theorem G.8](#).

878 **Corollary G.15.** *Suppose that for every  $y \in \{r, t\}$  and  $k = 1, \dots, K$*

$$|\Phi(0, 0)|, |\xi_y^k(0)| \leq B, \quad L_\phi, L_{\xi_y^k} < L,$$

879 and  $\xi, \Phi$  are all non-negatively valued. Then, for every  $(W, f), (V, g) \in \mathcal{WL}_r$ ,

$$\|\text{Agg}(W, \Phi_f) - \text{Agg}(V, \Phi_g)\|_\square \leq 4K(L^2r + LB)\|f - g\|_\square + K(Lr + B)\|W - V\|_\square.$$

880 The proof follows the steps of [Corollary G.11](#).

### 881 **G.3 Lipschitz continuity theorems for MPNNs**

882 The following recurrence sequence will govern the propagation of the Lipschitz constant of the  
883 MPNN and the bound of signal along the layers.

884 **Lemma G.16.** *Let  $\mathbf{a} = (a_1, a_2, \dots)$  and  $\mathbf{b} = (b_1, b_2, \dots)$ . The solution to  $e_{t+1} = a_t e_t + b_t$ , with  
885 initialization  $e_0$ , is*

$$e_t = Z_t(\mathbf{a}, \mathbf{b}, e_0) := \prod_{j=0}^{t-1} a_j e_0 + \sum_{j=1}^{t-1} \prod_{i=1}^{j-1} a_{t-i} b_{t-j}, \quad (28)$$

886 where, by convention,

$$\prod_{i=1}^0 a_{t-i} := 1.$$

887 In case there exist  $a, b \in \mathbb{R}$  such that  $a_i = a$  and  $b_i = b$  for every  $i$ ,

$$e_t = a^t e_0 + \sum_{j=0}^{t-1} a^j b.$$

888 **Setting 1.**

889 **Theorem G.17.** Let  $\Theta$  be a MPNN with  $T$  layers. Suppose that for every layer and every  $y$  and  $k$ ,

$$\|\xi_y^k\|_\infty, \|\eta^t\|_\infty \leq \rho, \quad L_{\eta^t}, L_{\xi_y^k} < L.$$

890 Let  $(W, f), (V, g) \in \mathcal{WL}_r$ . Then, for MPNN with no update function

$$\|\Theta_t(W, f) - \Theta_t(V, g)\|_\square \leq (4KL\rho)^t \|f - g\|_\square + \sum_{j=0}^{t-1} (4KL\rho)^j 4K\rho^2 \|W - V\|_\square,$$

891 and for MPNN with update function

$$\|\Theta_t(W, f) - \Theta_t(V, g)\|_\square \leq (4KL^2\rho)^t \|f - g\|_\square + \sum_{j=0}^{t-1} (4KL^2\rho)^j 4K\rho^2 L \|W - V\|_\square.$$

892 *Proof.* We prove for MPNNs with update function, where the proof without update function is similar.

893 We can write a recurrence sequence for a bound  $\|\Theta_t(W, f) - \Theta_t(V, g)\|_\square \leq e_t$ , by [Theorem G.8](#)  
894 and [Lemma G.9](#), as

$$e_{t+1} = 4KL^2\rho e_t + 4K\rho^2 L \|W - V\|_\square.$$

895 The proof now follows by applying [Lemma G.16](#) with  $a = 4KL^2\rho$  and  $b = 4K\rho^2 L$ . ■

896 **Setting 2.**

897 **Lemma G.18.** Let  $\Theta$  be a MPNN with  $T$  layers. Suppose that for every layer  $t$  and every  $y \in \{r, t\}$   
898 and  $k \in [K]$ ,

$$|\eta^t(0)|, |\xi_y^k(0)| \leq B, \quad L_{\eta^t}, L_{\xi_y^k} < L$$

899 with  $L, B > 1$ . Let  $(W, f) \in \mathcal{WL}_r$ . Then, for MPNN without update function, for every layer  $t$ ,

$$\|\Theta_t(W, f)\|_\infty \leq (2KL^2B^2)^{2^t} \|f\|_\infty^{2^t},$$

900 and for MPNN with update function, for every layer  $t$ ,

$$\|\Theta_t(W, f)\|_\infty \leq (2KL^3B^2)^{2^t} \|f\|_\infty^{2^t},$$

901 *Proof.* We first prove for MPNNs without update functions. Denote by  $C_t$  a bound on  $\|f\|_\infty$ , and let  
902  $C_0$  be a bound on  $\|f\|_\infty$ . By [Lemma G.10](#), we may choose bounds such that

$$C_{t+1} \leq K(LC_t + B)^2 = KL^2C_t^2 + 2KLBC_t + KB^2.$$

903 We can always choose  $C_t, K, L > 1$ , and therefore,

$$C_{t+1} \leq KL^2C_t^2 + 2KLBC_t + KB^2 \leq 2KL^2B^2C_t^2.$$

904 Denote  $a = 2KL^2B^2$ . We have

$$\begin{aligned} C_{t+1} &= a(C_t)^2 = a(aC_{t-1}^2)^2 = a^{1+2}C_{t-1}^4 = a^{1+2}(a(C_{t-2})^2)^4 \\ &= a^{1+2+4}(C_{t-2})^8 = a^{1+2+4+8}(C_{t-3})^{16} \leq a^{2^t}C_0^{2^t}. \end{aligned}$$

905 Now, for MPNNs with update function, we have

$$\begin{aligned} C_{t+1} &\leq LK(LC_t + B)^2 + B \\ &= KL^3C_t^2 + 2KL^2BC_t + KB^2L + B \\ &\leq 2KL^3B^2C_t^2, \end{aligned}$$

906 and we proceed similarly. ■

907

**Theorem G.19.** Let  $\Theta$  be a MPNN with  $T$  layers. Suppose that for every layer  $t$  and every  $y \in \{r, t\}$  and  $k \in [K]$ ,

$$|\eta^t(0)|, |\xi_y^k(0)| \leq B, \quad L_{\eta^t}, L_{\xi_y^k} < L,$$

with  $L, B > 1$ . Let  $(W, g), (V, g) \in \mathcal{WL}_r$ . Then, for MPNNs without update functions

$$\begin{aligned} \|\Theta_t(W, f) - \Theta_t(V, g)\|_{\square} &\leq \prod_{j=0}^{t-1} 4K(L^2 r_j + LB) \|f - g\|_{\square} \\ &\quad + \sum_{j=1}^{t-1} \prod_{i=1}^{j-1} 4K(L^2 r_{t-i} + LB) 4K(L r_{t-j} + B)^2 \|W - V\|_{\square}, \end{aligned}$$

where

$$r_i = (2KL^2 B^2)^{2^i} \|f\|_{\infty}^{2^i},$$

and for MPNNs with update functions

$$\begin{aligned} \|\Theta_t(W, f) - \Theta_t(V, g)\|_{\square} &\leq \prod_{j=0}^{t-1} 4K(L^3 r_j + L^2 B) \|f - g\|_{\square} \\ &\quad + \sum_{j=1}^{t-1} \prod_{i=1}^{j-1} 4K(L^3 r_{t-i} + L^2 B) 4KL(L r_{t-j} + B)^2 \|W - V\|_{\square}, \end{aligned}$$

where

$$r_i = (2KL^3 B^2)^{2^i} \|f\|_{\infty}^{2^i}.$$

*Proof.* We prove for MPNNs without update functions. The proof for the other case is similar. By [Corollary G.11](#), since the signals at layer  $t$  are bounded by

$$r_t = (2KL^2 B^2)^{2^t} \|f\|_{\infty}^{2^t},$$

we have

$$\begin{aligned} &\|\Theta_{t+1}(W, f) - \Theta_{t+1}(V, g)\|_{\square} \\ &\leq 4K(L^2 r_t + LB) \|\Theta_t(W, f) - \Theta_t(V, g)\|_{\square} + 4K(L r_t + B)^2 \|W - V\|_{\square}. \end{aligned}$$

We hence derive a recurrence sequence for a bound  $\|\Theta_t(W, f) - \Theta_t(V, g)\|_{\square} \leq e_t$ , as

$$e_{t+1} = 4K(L^2 r_t + LB) e_t + 4K(L r_t + B)^2 \|W - V\|_{\square}.$$

We now apply [Lemma G.16](#). ■

**Setting 3.**

**Lemma G.20.** Suppose that for every layer  $t$  and every  $y \in \{r, t\}$  and  $k = 1, \dots, K$ ,

$$|\eta^t(0)|, |\Phi^t(0, 0)|, |\xi_y^k(0)| \leq B, \quad L_{\eta^t}, L_{\Phi^t}, L_{\xi_y^k} < L,$$

and  $\xi, \Phi$  are all non-negatively valued. Then, for MPNNs without update function

$$\|\Theta^t(W, f)\|_{\infty} \leq L^t \|f\|_{\infty} + \sum_{j=1}^{t-1} L^j B,$$

and for MPNNs with update function

$$\|\Theta^t(W, f)\|_{\infty} \leq L^{2t} \|f\|_{\infty} + \sum_{j=1}^{t-1} L^{2j} (LB + B),$$

*Proof.* We first prove for MPNNs without update functions. By [Lemma G.10](#), there is a bound  $e_t$  of  $\|\Theta^t(W, f)\|_{\infty}$  that satisfies

$$e_t = L e_{t-1} + B.$$

Solving this recurrent sequence via [Lemma G.16](#) concludes the proof.

Lastly, for MPNN with update functions, we have a bound that satisfies

$$e_t = L^2 e_{t-1} + LB + B,$$

and we proceed as before. ■

928 **Lemma G.21.** Suppose that for every  $y \in \{r, t\}$  and  $k = 1, \dots, K$

$$|\eta^t(0)|, |\Phi(0, 0)|, |\xi_y^k(0)| \leq B, \quad L_\Phi, L_{\xi_y^k} < L,$$

929 and  $\xi, \Phi$  are all non-negatively valued. Let  $(W, g), (V, g) \in \mathcal{WL}_r$ . Then, for MPNNs without update  
930 functions

$$\|\Theta^t(W, \Phi_f) - \Theta^t(V, \Phi_g)\|_\square = O(K^t L^{2t+t^2} r^t B^t) (\|W - V\|_\square + \|f - g\|_\square),$$

931 and for MPNNs with update functions

$$\|\Theta^t(W, \Phi_f) - \Theta^t(V, \Phi_g)\|_\square = O(K^t L^{3t+2t^2} r^t B^t) (\|W - V\|_\square + \|f - g\|_\square)$$

932 *Proof.* We start with MPNNs without update functions. By [Corollary G.15](#) and [Lemma G.20](#), there is  
933 a bound  $e_t$  on the error  $\|\Theta^t(W, \Phi_f) - \Theta^t(V, \Phi_g)\|_\square$  at step  $t$  that satisfies

$$\begin{aligned} e_t &= 4K(L^2 r_{t-1} + LB)e_{t-1} + K(Lr + B)\|W - V\|_\square \\ &= 4K\left(L^2(L^t\|f\|_\infty + \sum_{j=1}^{t-1} L^j B) + LB\right)e_{t-1} + K\left(L(L^t\|f\|_\infty + \sum_{j=1}^{t-1} L^j B) + B\right)\|W - V\|_\square. \end{aligned}$$

934 Hence, by [Lemma G.16](#), and  $Z$  defined by (28),

$$e_t = Z_t(\mathbf{a}, \mathbf{b}, \|f - g\|_\square) = O(K^t L^{2t+t^2} r^t B^t) (\|f - g\|_\square + \|W - V\|_\square),$$

935 where in the notations of [Lemma G.16](#),

$$a_t = 4K\left(L^2(L^t\|f\|_\infty + \sum_{j=1}^{t-1} L^j B) + LB\right)$$

936 and

$$b_t = K\left(L(L^t\|f\|_\infty + \sum_{j=1}^{t-1} L^j B) + B\right)\|W - V\|_\square.$$

937 Next, for MPNNs with update functions, there is a bound that satisfies

$$\begin{aligned} e_t &= 4K(L^3 r_{t-1} + L^2 B)e_{t-1} + K(L^2 r + LB)\|W - V\|_\square \\ &= 4K\left(L^3(L^{2t}\|f\|_\infty + \sum_{j=1}^{t-1} L^{2j}(LB + B)) + L^2 B\right)e_{t-1} \\ &\quad + K\left(L^2(L^{2t}\|f\|_\infty + \sum_{j=1}^{t-1} L^{2j}(LB + B)) + LB\right)\|W - V\|_\square. \end{aligned}$$

938 Hence, by [Lemma G.16](#), and  $Z$  defined by (28),

$$e_t = O(K^t L^{3t+2t^2} r^t B^t) (\|f - g\|_\square + \|W - V\|_\square).$$

939 ■

## 940 H Generalization bound for MPNNs

941 In this appendix we prove [Theorem 4.2](#).

### 942 H.1 Statistical learning and generalization analysis

943 In the statistical setting of learning, we suppose that the dataset comprises independent random  
944 samples from a probability space that describes all possible data  $\mathcal{P}$ . We suppose that for each  
945  $x \in \mathcal{P}$  there is a ground truth value  $y_x \in \mathcal{Y}$ , e.g., the ground truth class or value of  $x$ , where  $\mathcal{Y}$   
946 is, in general, some measure space. The *loss* is a measurable function  $\mathcal{L} : \mathcal{Y}^2 \rightarrow \mathbb{R}_+$  that defines

947 similarity in  $\mathcal{Y}$ . Given a measurable function  $\Theta : \mathcal{P} \rightarrow \mathcal{Y}$ , that we call the *model* or *network*, its  
 948 accuracy on all potential inputs is defined as the *statistical risk*  $R_{\text{stat}}(\Theta) = \mathbb{E}_{x \sim \mathcal{P}}(\mathcal{L}(\Theta(x), y_x))$ .  
 949 The goal in learning is to find a network  $\Theta$ , from some *hypothesis space*  $\mathcal{T}$ , that has a low statistical  
 950 risk. In practice, the statistical risk cannot be computed analytically. Instead, we suppose that a  
 951 dataset  $\mathcal{X} = \{x_m\}_{m=1}^M \subset \mathcal{P}$  of  $M \in \mathbb{N}$  random independent samples with corresponding values  
 952  $\{y_m\}_{m=1}^M \subset \mathcal{Y}$  is given. We estimate the statistical risk via a “Monte Carlo approximation,” called  
 953 the *empirical risk*  $R_{\text{emp}}(\Theta) = \frac{1}{M} \sum_{m=1}^M \mathcal{L}(\Theta(x_m), y_m)$ . The network  $\Theta$  is chosen in practice by  
 954 optimizing the empirical risk. The goal in generalization analysis is to show that if a learned  $\Theta$  attains  
 955 a low empirical risk, then it is also guaranteed to have a low statistical risk.

956 One technique for bounding the statistical risk in terms of the empirical risk is to use  
 957 the bound  $R_{\text{stat}}(\Theta) \leq R_{\text{emp}}(\Theta) + E$ , where  $E$  is the *generalization error*  $E =$   
 958  $\sup_{\Theta \in \mathcal{T}} |R_{\text{stat}}(\Theta) - R_{\text{emp}}(\Theta)|$ , and to find a bound for  $E$ . Since the trained network  $\Theta = \Theta_{\mathcal{X}}$   
 959 depends on the data  $\mathcal{X}$ , the network is not a constant when varying the dataset, and hence the  
 960 empirical risk is not really a Monte Carlo approximation of the statistical risk in the learning set-  
 961 ting. If the network  $\Theta$  was fixed, then Monte Carlo theory would have given us a bound of  $E^2$  of  
 962 order  $O(\kappa(p)/M)$  in an event of probability  $1 - p$ , where, for example, in Hoeffding’s inequality  
 963 [Theorem H.2](#),  $\kappa(p) = \log(2/p)$ . Let us call such an event a *good sampling event*. Since the good  
 964 sampling event depends on  $\Theta$ , computing a naive bound to the generalization error would require  
 965 intersecting all good sampling events for all  $\Theta \in \mathcal{T}$ . Uniform convergence bounds are approaches for  
 966 intersecting adequate sampling events that allow bounding the generalization error more efficiently.  
 967 This intersection of events leads to a term in the generalization bound, called the *complexity/capacity*,  
 968 that describes the richness of the hypothesis space  $\mathcal{T}$ . This is the philosophy behind approaches such  
 969 as VC-dimension, Rademacher dimension, fat-shattering dimension, pseudo-dimension, and uniform  
 970 covering number (see, e.g., [\[32\]](#)).

## 971 H.2 Classification setting

972 We define a ground truth classifier into  $C$  classes as follows. Let  $\mathcal{C} : \widetilde{\mathcal{WL}}_r \rightarrow \mathbb{R}^C$  be a measur-  
 973 able piecewise constant function of the following form. There is a partition of  $\mathcal{WL}_r$  into disjoint  
 974 measurable sets  $B_1, \dots, B_C \subset \widetilde{\mathcal{WL}}_r$  such that  $\bigcup_{i=1}^C B_i = \widetilde{\mathcal{WL}}_r$ , and for every  $i \in [C]$  and every  
 975  $x \in B_i$ ,

$$\mathcal{C}(x) = e_i,$$

976 where  $e_i \in \mathbb{R}^C$  is the standard basis element with entries  $(e_i)_j = \delta_{i,j}$ , where  $\delta_{i,j}$  is the Kronecker  
 977 delta.

978 We define an arbitrary data distribution as follows. Let  $\mathcal{B}$  be the Borel  $\sigma$ -algebra of  $\widetilde{\mathcal{WL}}_r$ , and  $\nu$  be  
 979 any probability measure on the measurable space  $(\widetilde{\mathcal{WL}}_r, \mathcal{B})$ . We may assume that we complete  $\mathcal{B}$   
 980 with respect to  $\nu$ , obtaining the  $\sigma$ -algebra  $\Sigma$ . If we do not complete the measure, we just denote  
 981  $\Sigma = \mathcal{B}$ . Defining  $(\widetilde{\mathcal{WL}}_r, \Sigma, \nu)$  as a complete measure space or not will not affect our construction.

982 Let  $\mathcal{S}$  be a metric space. Let  $\text{Lip}(\mathcal{S}, L)$  be the space of Lipschitz continuous mappings  $\Upsilon : \mathcal{S} \rightarrow \mathbb{R}^C$   
 983 with Lipschitz constant  $L$ . Note that by [Theorem 4.1](#), for every  $i \in [C]$ , the space of MPNN  
 984 with Lipschitz continuous input and output message functions and Lipschitz update functions,  
 985 restricted to  $B_i$ , is a subset of  $\text{Lip}(B_i, L_1)$  which is the restriction of  $\text{Lip}(\widetilde{\mathcal{WL}}_r, L_1)$  to  $B_i \subset \widetilde{\mathcal{WL}}_r$ ,  
 986 for some  $L_1 > 0$ . Moreover,  $B_i$  has finite covering  $\kappa(\epsilon)$  given in [\(25\)](#). Let  $\mathcal{E}$  be a Lipschitz  
 987 continuous loss function with Lipschitz constant  $L_2$ . Therefore, since  $\mathcal{C}|_{B_i}$  is in  $\text{Lip}(B_i, 0)$ , for any  
 988  $\Upsilon \in \text{Lip}(\widetilde{\mathcal{WL}}_r, L_1)$ , the function  $\mathcal{E}(\Upsilon|_{B_i}, \mathcal{C}|_{B_i})$  is in  $\text{Lip}(B_i, L)$  with  $L = L_1 L_2$ .

## 989 H.3 Uniform Monte Carlo approximation of Lipschitz continuous functions

990 The proof of [Theorem 4.2](#) is based on the following [Theorem H.3](#), which studies uniform Monte  
 991 Carlo approximations of Lipschitz continuous functions over metric spaces with finite covering.

992 **Definition H.1.** A metric space  $\mathcal{M}$  is said to have covering number  $\kappa : (0, \infty) \rightarrow \mathbb{N}$ , if for every  
 993  $\epsilon > 0$ , the space  $\mathcal{M}$  can be covered by  $\kappa(\epsilon)$  ball of radius  $\epsilon$ .

994 **Theorem H.2** (Hoeffding's Inequality). *Let  $Y_1, \dots, Y_N$  be independent random variables such that*  
 995  *$a \leq Y_i \leq b$  almost surely. Then, for every  $k > 0$ ,*

$$\mathbb{P}\left(\left|\frac{1}{N} \sum_{i=1}^N (Y_i - \mathbb{E}[Y_i])\right| \geq k\right) \leq 2 \exp\left(-\frac{2k^2 N}{(b-a)^2}\right).$$

996 The following theorem is an extended version of [25, Lemma B.3], where the difference is that we  
 997 use a general covering number  $\kappa(\epsilon)$ , where in [25, Lemma B.3] the covering number is exponential  
 998 in  $\epsilon$ . For completion, we repeat here the proof, with the required modification.

**Theorem H.3** (Uniform Monte Carlo approximation for Lipschitz continuous functions). *Let  $\mathcal{X}$  be a probability metric space<sup>5</sup>, with probability measure  $\mu$ , and covering number  $\kappa(\epsilon)$ . Let  $X_1, \dots, X_N$  be drawn i.i.d. from  $\mathcal{X}$ . Then, for every  $p > 0$ , there exists an event  $\mathcal{E}_{\text{Lip}}^p \subset \mathcal{X}^N$  (regarding the choice of  $(X_1, \dots, X_N)$ ), with probability*

$$\mu^N(\mathcal{E}_{\text{Lip}}^p) \geq 1 - p,$$

999 *such that for every  $(X_1, \dots, X_N) \in \mathcal{E}_{\text{Lip}}^p$ , for every bounded Lipschitz continuous function  $F : \mathcal{X} \rightarrow$*   
 1000  *$\mathbb{R}^d$  with Lipschitz constant  $L_F$ , we have*

$$\left\| \int F(x) d\mu(x) - \frac{1}{N} \sum_{i=1}^N F(X_i) \right\|_{\infty} \leq 2\xi^{-1}(N)L_F + \frac{1}{\sqrt{2}}\xi^{-1}(N)\|F\|_{\infty}(1 + \sqrt{\log(2/p)}), \quad (29)$$

1001 *where  $\xi(r) = \frac{\kappa(r)^2 \log(\kappa(r))}{r^2}$  and  $\xi^{-1}$  is the inverse function of  $\xi$ .*

1002 *Proof.* Let  $r > 0$ . There exists a covering of  $\mathcal{X}$  by a set of balls  $\{B_j\}_{j \in [J]}$  of radius  $r$ , where  
 1003  $J = \kappa(r)$ . For  $j = 2, \dots, J$ , we define  $I_j := B_j \setminus \cup_{i < j} B_i$ , and define  $I_1 = B_1$ . Hence,  $\{I_j\}_{j \in [J]}$   
 1004 is a family of measurable sets such that  $I_j \cap I_i = \emptyset$  for all  $i \neq j \in [J]$ ,  $\bigcup_{j \in [J]} I_j = \mathcal{X}$ , and  
 1005  $\text{diam}(I_j) \leq 2r$  for all  $j \in [J]$ , where by convention  $\text{diam}(\emptyset) = 0$ . For each  $j \in [J]$ , let  $z_j$  be the  
 1006 center of the ball  $B_j$ .

1007 Next, we compute a concentration of error bound on the difference between the measure of  $I_j$  and its  
 1008 Monte Carlo approximation, which is uniform in  $j \in [J]$ . Let  $j \in [J]$  and  $q \in (0, 1)$ . By Hoeffding's  
 1009 inequality [Theorem H.2](#), there is an event  $\mathcal{E}_j^q$  with probability  $\mu(\mathcal{E}_j^q) \geq 1 - q$ , in which

$$\left\| \frac{1}{N} \sum_{i=1}^N \mathbb{1}_{I_j}(X_i) - \mu(I_j) \right\|_{\infty} \leq \frac{1}{\sqrt{2}} \frac{\sqrt{\log(2/q)}}{\sqrt{N}}. \quad (30)$$

1010 Consider the event

$$\mathcal{E}_{\text{Lip}}^{Jq} = \bigcap_{j=1}^J \mathcal{E}_j^q,$$

1011 with probability  $\mu^N(\mathcal{E}_{\text{Lip}}^{Jq}) \geq 1 - Jq$ . In this event, (30) holds for all  $j \in \mathcal{J}$ . We change the failure  
 1012 probability variable  $p = Jq$ , and denote  $\mathcal{E}_{\text{Lip}}^p = \mathcal{E}_{\text{Lip}}^{Jq}$ .

1013 Next we bound uniformly the Monte Carlo approximation error of the integral of bounded Lipschitz  
 1014 continuous functions  $F : \mathcal{X} \rightarrow \mathbb{R}^F$ . Let  $F : \mathcal{X} \rightarrow \mathbb{R}^F$  be a bounded Lipschitz continuous function  
 1015 with Lipschitz constant  $L_F$ . We define the step function

$$F^r(y) = \sum_{j \in [J]} F(z_j) \mathbb{1}_{I_j}(y).$$

---

<sup>5</sup>A metric space with a probability Borel measure, where we either take the completion of the measure space with respect to  $\mu$  (adding all subsets of null-sets to the  $\sigma$ -algebra) or not.

1016 Then,

$$\begin{aligned}
\left\| \frac{1}{N} \sum_{i=1}^N F(X_i) - \int_{\mathcal{X}} F(y) d\mu(y) \right\|_{\infty} &\leq \left\| \frac{1}{N} \sum_{i=1}^N F(X_i) - \frac{1}{N} \sum_{i=1}^N F^r(X_i) \right\|_{\infty} \\
&+ \left\| \frac{1}{N} \sum_{i=1}^N F^r(X_i) - \int_{\mathcal{X}} F^r(y) d\mu(y) \right\|_{\infty} \\
&+ \left\| \int_{\mathcal{X}} F^r(y) d\mu(y) - \int_{\mathcal{X}} F(y) d\mu(y) \right\|_{\infty} \\
&=: (1) + (2) + (3).
\end{aligned} \tag{31}$$

1017 To bound (1), we define for each  $X_i$  the unique index  $j_i \in [J]$  s.t.  $X_i \in I_{j_i}$ . We calculate,

$$\begin{aligned}
\left\| \frac{1}{N} \sum_{i=1}^N F(X_i) - \frac{1}{N} \sum_{i=1}^N F^r(X_i) \right\|_{\infty} &\leq \frac{1}{N} \sum_{i=1}^N \left\| F(X_i) - \sum_{j \in \mathcal{J}} F(z_j) \mathbf{1}_{I_j}(X_i) \right\|_{\infty} \\
&= \frac{1}{N} \sum_{i=1}^N \|F(X_i) - F(z_{j_i})\|_{\infty} \\
&\leq r L_F.
\end{aligned}$$

1018 We proceed by bounding (2). In the event of  $\mathcal{E}_{\text{Lip}}^p$ , which holds with probability at least  $1 - p$ , equation  
1019 (30) holds for all  $j \in \mathcal{J}$ . In this event, we get

$$\begin{aligned}
\left\| \frac{1}{N} \sum_{i=1}^N F^r(X_i) - \int_{\mathcal{X}} F^r(y) d\mu(y) \right\|_{\infty} &= \left\| \sum_{j \in [J]} \left( \frac{1}{N} \sum_{i=1}^N F(z_j) \mathbf{1}_{I_j}(X_i) - \int_{I_j} F(z_j) dy \right) \right\|_{\infty} \\
&\leq \sum_{j \in [J]} \|F\|_{\infty} \left| \frac{1}{N} \sum_{i=1}^N \mathbf{1}_{I_j}(X_i) - \mu(I_j) \right| \\
&\leq J \|F\|_{\infty} \frac{1}{\sqrt{2}} \frac{\sqrt{\log(2J/p)}}{\sqrt{N}}.
\end{aligned}$$

1020 Recall that  $J = \kappa(r)$ . Then, with probability at least  $1 - p$

$$\begin{aligned}
&\left\| \frac{1}{N} \sum_{i=1}^N F^r(X_i) - \int_{\mathcal{X}} F^r(y) d\mu(y) \right\|_{\infty} \\
&\leq \kappa(r) \|F\|_{\infty} \frac{1}{\sqrt{2}} \frac{\sqrt{\log(\kappa(r)) + \log(2/p)}}{\sqrt{N}}.
\end{aligned}$$

1021 To bound (3), we calculate

$$\begin{aligned}
\left\| \int_{\mathcal{X}} F^r(y) d\mu(y) - \int_{\mathcal{X}} F(y) d\mu(y) \right\|_{\infty} &= \left\| \int_{\mathcal{X}} \sum_{j \in [J]} F(z_j) \mathbf{1}_{I_j} d\mu(y) - \int_{\mathcal{X}} F(y) d\mu(y) \right\|_{\infty} \\
&\leq \sum_{j \in [J]} \int_{I_j} \|F(z_j) - F(y)\|_{\infty} d\mu(y) \\
&\leq r L_F.
\end{aligned}$$

1022 By plugging the bounds of (1), (2) and (3) into (31), we get

$$\begin{aligned}
\left\| \frac{1}{N} \sum_{i=1}^N F(X_i) - \int_{\mathcal{X}} F(y) d\mu(y) \right\|_{\infty} &\leq 2rL_F + \kappa(r)\|F\|_{\infty} \frac{1}{\sqrt{2}} \frac{\sqrt{\log(\kappa(r)) + \log(2/p)}}{\sqrt{N}} \\
&\leq 2rL_F + \frac{1}{\sqrt{2}} \kappa(r)\|F\|_{\infty} \frac{\sqrt{\log(\kappa(r))} + \sqrt{\log(2/p)}}{\sqrt{N}} \\
&\leq 2rL_F + \frac{1}{\sqrt{2}} \kappa(r)\|F\|_{\infty} \frac{\sqrt{\log(\kappa(r))}}{\sqrt{N}} (1 + \sqrt{\log(2/p)}).
\end{aligned}$$

1023 Lastly, choosing  $r = \xi^{-1}(N)$  for  $\xi(r) = \frac{\kappa(r)^2 \log(\kappa(r))}{r^2}$ , gives  $\frac{\kappa(r)\sqrt{\log(\kappa(r))}}{\sqrt{N}} = r$ , so

$$\begin{aligned}
&\left\| \frac{1}{N} \sum_{i=1}^N F(X_i) - \int_{\mathcal{X}} F(y) d\mu(y) \right\|_{\infty} \\
&\leq 2\xi^{-1}(N)L_f + \frac{1}{\sqrt{2}} \xi^{-1}(N)\|F\|_{\infty} (1 + \sqrt{\log(2/p)}).
\end{aligned}$$

1024 Since the event  $\mathcal{E}_{\text{Lip}}^p$  is independent of the choice of  $F : \mathcal{X} \rightarrow \mathbb{R}^F$ , the proof is finished.  $\blacksquare$

#### 1025 H.4 A generalization theorem for MPNNs

1026 The following generalization theorem of MPNN is now a direct result of [Theorem H.3](#).

1027 Let  $\text{Lip}(\widetilde{\mathcal{WL}}_r, L_1)$  denote the space of Lipschitz continuous functions  $\Theta : \mathcal{WL}_r \rightarrow \mathbb{R}^C$  with  
1028 Lipschitz bound bounded by  $L_1$  and  $\|\Theta\|_{\infty} \leq L_1$ . We note that the theorems of [Appendix G.2](#) prove  
1029 that MPNN with Lipschitz continuous message and update functions, and bounded formal biases, are  
1030 in  $\text{Lip}(\widetilde{\mathcal{WL}}_r, L_1)$ .

**Theorem H.4** (MPNN generalization theorem). *Consider the classification setting of [Appendix H.2](#). Let  $X_1, \dots, X_N$  be independent random samples from the data distribution  $(\widetilde{\mathcal{WL}}_r, \Sigma, \nu)$ . Then, for every  $p > 0$ , there exists an event  $\mathcal{E}^p \subset \widetilde{\mathcal{WL}}_r^N$  regarding the choice of  $(X_1, \dots, X_N)$ , with probability*

$$\nu^N(\mathcal{E}^p) \geq 1 - Cp - 2\frac{C^2}{N},$$

1031 in which for every function  $\Upsilon$  in the hypothesis class  $\text{Lip}(\widetilde{\mathcal{WL}}_r, L_1)$ , with we have

$$\left| \mathcal{R}(\Upsilon_{\mathbf{X}}) - \hat{\mathcal{R}}(\Upsilon_{\mathbf{X}}, \mathbf{X}) \right| \leq \xi^{-1}(N/2C) \left( 2L + \frac{1}{\sqrt{2}} (L + \mathcal{E}(0, 0)) (1 + \sqrt{\log(2/p)}) \right), \quad (32)$$

1032 where  $\xi(r) = \frac{\kappa(r)^2 \log(\kappa(r))}{r^2}$ ,  $\kappa$  is the covering number of  $\widetilde{\mathcal{WL}}_r$  given in (25), and  $\xi^{-1}$  is the inverse  
1033 function of  $\xi$ .

1034 *Proof.* For each  $i \in [C]$ , let  $S_i$  be the number of samples of  $\mathbf{X}$  that falls within  $B_i$ . The ran-  
1035 dom variable  $(S_1, \dots, S_C)$  is multinomial, with expected value  $(N/C, \dots, N/C)$  and variance  
1036  $(\frac{N(C-1)}{C^2}, \dots, \frac{N(C-1)}{C^2}) \leq (\frac{N}{C}, \dots, \frac{N}{C})$ . We now use Chebyshev's inequality, which states that for  
1037 any  $a > 0$ ,

$$P\left(|S_i - N/C| > a\sqrt{\frac{N}{C}}\right) < a^{-2}.$$

1038 We choose  $a\sqrt{\frac{N}{C}} = \frac{N}{2C}$ , so  $a = \frac{N^{1/2}}{2C^{1/2}}$ , and

$$P(|S_i - N/C| > \frac{N}{2C}) < \frac{2C}{N}.$$

1039 Therefore,

$$P(S_i > \frac{N}{2C}) > 1 - \frac{2C}{N}.$$

1040 We intersect these events of  $i \in [C]$ , and get an event  $\mathcal{E}_{\text{mult}}$  of probability more than  $1 - 2\frac{C^2}{N}$  in which  
 1041  $S_i > \frac{N}{2C}$  for every  $i \in [C]$ . In the following, given a set  $B_i$  we consider a realization  $M = S_i$ , and  
 1042 then use the law of total probability.

From [Theorem H.3](#) we get the following. For every  $p > 0$ , there exists an event  $\mathcal{E}_i^p \subset B_i^M$  regarding the choice of  $(X_1, \dots, X_M) \subset B_i$ , with probability

$$\nu^M(\mathcal{E}_{\text{Lip}}^p) \geq 1 - p,$$

1043 such that for every function  $\Upsilon'$  in the hypothesis class  $\text{Lip}(\widetilde{\mathcal{WL}}_r, L_1)$ , we have

$$\left| \int \mathcal{E}(\Upsilon'(x), \mathcal{C}(x)) d\nu(x) - \frac{1}{M} \sum_{i=1}^M \mathbb{E}(\Upsilon'(X_i), \mathcal{C}(X_i)) \right| \quad (33)$$

$$\leq 2\xi^{-1}(M)L + \frac{1}{\sqrt{2}}\xi^{-1}(M)\|\mathcal{E}(\Upsilon'(\cdot), \mathcal{C}(\cdot))\|_{\infty}(1 + \sqrt{\log(2/p)}) \quad (34)$$

$$\leq 2\xi^{-1}(N/2C)L + \frac{1}{\sqrt{2}}\xi^{-1}(N/2C)(L + \mathcal{E}(0, 0))(1 + \sqrt{\log(2/p)}), \quad (35)$$

1044 where  $\xi(r) = \frac{\kappa(r)^2 \log(\kappa(r))}{r^2}$ ,  $\kappa$  is the covering number of  $\widetilde{\mathcal{WL}}_r$  given in [\(25\)](#), and  $\xi^{-1}$  is the inverse  
 1045 function of  $\xi$ . In the last inequality, we use the bound, for every  $x \in \widetilde{\mathcal{WL}}_r$ ,

$$|\mathcal{E}(\Upsilon'(x), \mathcal{C}(x))| \leq |\mathcal{E}(\Upsilon'(x), \mathcal{C}(x)) - \mathcal{E}(0, 0)| + |\mathcal{E}(0, 0)| \leq L_2 |L_1 - 0| + |\mathcal{E}(0, 0)|.$$

1046 Since [\(33\)](#) is true for any  $\Upsilon' \in \text{Lip}(\widetilde{\mathcal{WL}}_r, L_1)$ , it is also true for  $\Upsilon_{\mathbf{X}}$  for any realization of  $\mathbf{X}$ , so we  
 1047 also have

$$|\mathcal{R}(\Upsilon_{\mathbf{X}}) - \hat{\mathcal{R}}(\Upsilon_{\mathbf{X}}, \mathbf{X})| \leq 2\xi^{-1}(N/2C)L + \frac{1}{\sqrt{2}}\xi^{-1}(N/2C)(L + \mathcal{E}(0, 0))(1 + \sqrt{\log(2/p)}).$$

1048 Lastly, we denote

$$\mathcal{E}^p = \mathcal{E}_{\text{mult}} \cap \left( \bigcup_{i=1}^C \mathcal{E}_i^p \right).$$

1049 ■

## 1050 I Stability of MPNNs to graph subsampling

1051 Lastly, we prove [Theorem 4.3](#).

1052 **Theorem I.1.** Consider the setting of [Theorem 4.2](#), and let  $\Theta$  be a MPNN with Lipschitz constant  $L$ .  
 1053 Denote

$$\Sigma = (W, \Theta(W, f)), \quad \text{and} \quad \Sigma(\Lambda) = (\mathbb{G}(W, \Lambda), \Theta(\mathbb{G}(W, \Lambda), f(\Lambda))).$$

1054 Then

$$\mathbb{E}(\delta_{\square}(\Sigma, \Sigma(\Lambda))) < \frac{15}{\sqrt{\log(k)}}L.$$

1055 *Proof.* By Lipschitz continuity of  $\Theta$ ,

$$\delta_{\square}(\Sigma, \Sigma(\Lambda)) \leq L\delta_{\square}((W, f), (\mathbb{G}(W, \Lambda), f(\Lambda))).$$

1056 Hence,

$$\mathbb{E}(\delta_{\square}(\Sigma, \Sigma(\Lambda))) \leq L\mathbb{E}(\delta_{\square}((W, f), (\mathbb{G}(W, \Lambda), f(\Lambda)))).$$

1057 and the claim of the theorem follows from [Theorem 3.6](#). ■

1058 As explained in [Section 3.5](#), the above theorem of stability of MPNNs to graphon-signal sampling  
 1059 also applies to subsampling graph-signals.

## References

- [1] N. Alon, W. de la Vega, R. Kannan, and M. Karpinski. Random sampling and approximation of max-csps. *Journal of Computer and System Sciences*, 67(2):212–243, 2003. ISSN 0022-0000. doi: [https://doi.org/10.1016/S0022-0000\(03\)00008-4](https://doi.org/10.1016/S0022-0000(03)00008-4). Special Issue on STOC 2002.
- [2] K. Atz, F. Grisoni, and G. Schneider. Geometric deep learning on molecular representations. *Nature Machine Intelligence*, 3:1023–1032, 2021.
- [3] W. Azizian and M. Lelarge. Expressive power of invariant and equivariant graph neural networks. In *ICLR*, 2021.
- [4] C. Borgs, J. T. Chayes, L. Lovász, V. T. Sós, and K. Vesztegombi. Convergent sequences of dense graphs i: Subgraph frequencies, metric properties and testing. *Advances in Mathematics*, 219(6):1801–1851, 2008.
- [5] J. Chen, T. Ma, and C. Xiao. FastGCN: Fast learning with graph convolutional networks via importance sampling. In *International Conference on Learning Representations*, 2018.
- [6] Z. Chen, S. Villar, L. Chen, and J. Bruna. On the equivalence between graph isomorphism testing and function approximation with gnns. In *NeurIPS*. Curran Associates, Inc., 2019.
- [7] W.-L. Chiang, X. Liu, S. Si, Y. Li, S. Bengio, and C.-J. Hsieh. Cluster-gcn: An efficient algorithm for training deep and large graph convolutional networks. In *Proceedings of the 25th ACM SIGKDD International Conference on Knowledge Discovery and Data Mining, KDD '19*, page 257–266, New York, NY, USA, 2019. Association for Computing Machinery. ISBN 9781450362016. doi: 10.1145/3292500.3330925.
- [8] M. Defferrard, X. Bresson, and P. Vandergheynst. Convolutional neural networks on graphs with fast localized spectral filtering. In *NeurIPS*. Curran Associates Inc., 2016. ISBN 9781510838819.
- [9] J. M. S. et al. A deep learning approach to antibiotic discovery. *Cell*, 180(4):688 – 702.e13, 2020. ISSN 0092-8674.
- [10] M. Fey and J. E. Lenssen. Fast graph representation learning with PyTorch Geometric. In *ICLR 2019 Workshop on Representation Learning on Graphs and Manifolds*, 2019.
- [11] G. B. Folland. *Real analysis: modern techniques and their applications*, volume 40. John Wiley & Sons, 1999.
- [12] A. M. Frieze and R. Kannan. Quick approximation to matrices and applications. *Combinatorica*, 19:175–220, 1999.
- [13] V. Garg, S. Jegelka, and T. Jaakkola. Generalization and representational limits of graph neural networks. In H. D. III and A. Singh, editors, *ICML*, volume 119 of *Proceedings of Machine Learning Research*, pages 3419–3430. PMLR, 13–18 Jul 2020.
- [14] J. Gilmer, S. S. Schoenholz, P. F. Riley, O. Vinyals, and G. E. Dahl. Neural message passing for quantum chemistry. In *International Conference on Machine Learning*, pages 1263–1272, 2017.
- [15] W. L. Hamilton, R. Ying, and J. Leskovec. Inductive representation learning on large graphs. In *Advances in Neural Information Processing Systems*, page 1025–1035. Curran Associates Inc., 2017. ISBN 9781510860964.
- [16] J. M. Jumper, R. Evans, A. Pritzel, T. Green, M. Figurnov, O. Ronneberger, K. Tunyasuvunakool, R. Bates, A. Zidek, A. Potapenko, A. Bridgland, C. Meyer, S. A. A. Kohl, A. Ballard, A. Cowie, B. Romera-Paredes, S. Nikolov, R. Jain, J. Adler, T. Back, S. Petersen, D. A. Reiman, E. Clancy, M. Zielinski, M. Steinegger, M. Pacholska, T. Berghammer, S. Bodenstein, D. Silver, O. Vinyals, A. W. Senior, K. Kavukcuoglu, P. Kohli, and D. Hassabis. Highly accurate protein structure prediction with alphafold. *Nature*, 596:583 – 589, 2021.
- [17] N. Keriven, A. Bietti, and S. Vaiter. Convergence and stability of graph convolutional networks on large random graphs. In *Advances in Neural Information Processing Systems*. Curran Associates, Inc., 2020.
- [18] N. Keriven, A. Bietti, and S. Vaiter. On the universality of graph neural networks on large random graphs. In *NeurIPS*. Curran Associates, Inc., 2021.
- [19] T. N. Kipf and M. Welling. Semi-supervised classification with graph convolutional networks. In *ICLR*, 2017.

- 1113 [20] R. Levie, F. Monti, X. Bresson, and M. M. Bronstein. Cayleynets: Graph convolutional neural  
1114 networks with complex rational spectral filters. *IEEE Transactions on Signal Processing*, 67(1):  
1115 97–109, 2019. doi: 10.1109/TSP.2018.2879624.
- 1116 [21] R. Levie, W. Huang, L. Bucci, M. Bronstein, and G. Kutyniok. Transferability of spectral graph  
1117 convolutional neural networks. *Journal of Machine Learning Research*, 22(272):1–59, 2021.
- 1118 [22] R. Liao, R. Urtasun, and R. Zemel. A PAC-bayesian approach to generalization bounds for  
1119 graph neural networks. In *ICLR*, 2021.
- 1120 [23] L. M. Lovász. Large networks and graph limits. In *volume 60 of Colloquium Publications*,  
1121 2012. doi: 10.1090/coll/060.
- 1122 [24] L. M. Lovász and B. Szegedy. Szemerédi’s lemma for the analyst. *GAFGA Geometric And*  
1123 *Functional Analysis*, 17:252–270, 2007.
- 1124 [25] S. Maskey, R. Levie, Y. Lee, and G. Kutyniok. Generalization analysis of message passing  
1125 neural networks on large random graphs. In *NeurIPS*. Curran Associates, Inc., 2022.
- 1126 [26] S. Maskey, R. Levie, and G. Kutyniok. Transferability of graph neural networks: An extended  
1127 graphon approach. *Applied and Computational Harmonic Analysis*, 63:48–83, 2023. ISSN  
1128 1063-5203. doi: <https://doi.org/10.1016/j.acha.2022.11.008>.
- 1129 [27] O. Méndez-Lucio, M. Ahmad, E. A. del Rio-Chanona, and J. K. Wegner. A geometric deep  
1130 learning approach to predict binding conformations of bioactive molecules. *Nature Machine*  
1131 *Intelligence*, 3:1033–1039, 2021.
- 1132 [28] C. Morris, M. Ritzert, M. Fey, W. L. Hamilton, J. E. Lenssen, G. Rattan, and M. Grohe.  
1133 Weisfeiler and leman go neural: Higher-order graph neural networks. *Proceedings of the AAAI*  
1134 *Conference on Artificial Intelligence*, 33(01):4602–4609, Jul. 2019. doi: 10.1609/aaai.v33i01.  
1135 33014602.
- 1136 [29] C. Morris, F. Geerts, J. Tönshoff, and M. Grohe. Wl meet vc. In *ICML*. PMLR, 2023.
- 1137 [30] L. Ruiz, L. F. O. Chamon, and A. Ribeiro. Graphon signal processing. *IEEE Transactions on*  
1138 *Signal Processing*, 69:4961–4976, 2021.
- 1139 [31] F. Scarselli, A. C. Tsoi, and M. Hagenbuchner. The vapnik–chervonenkis dimension of graph  
1140 and recursive neural networks. *Neural Networks*, 108:248–259, 2018.
- 1141 [32] S. Shalev-Shwartz and S. Ben-David. *Understanding Machine Learning: From Theory to*  
1142 *Algorithms*. Cambridge University Press, 2014. doi: 10.1017/CBO9781107298019.
- 1143 [33] D. Williams. *Probability with Martingales*. Cambridge University Press, 1991. doi: 10.1017/  
1144 CBO9780511813658.
- 1145 [34] K. Xu, W. Hu, J. Leskovec, and S. Jegelka. How powerful are graph neural networks? In  
1146 *International Conference on Learning Representations*, 2019.
